# Supplementary material
Source: publisher site journal article supplement (https://www.spandidos-publications.com/4310/downloadSupplementary)
Supplement: Supplementary file 1 [file downloadSupplementary]

## Sheet: TopTable_PEA2_IGFBP6_Vs_PEA2
Table SII. DEGs in PEA2 cells treated with IGFBP6 vs. PEA2 Ctrl cells (P<0.05, abs logFC >0.58).
Ill_ID	Chr	Band	Symbol	Name	EntrezID	logFC	P.Value	adj.P.Val
ILMN_1757336I43A3:I46A3:I49A3:I52A3:I49A3:I48A3:I47A3:I46A3:I45A3:I44A3:I43A3:I42A3:I41A1A3:I39	3	3q29	LRCH3	leucine rich repeats and calponin homology domain containing 3	84859	0.826707	0.001982	0.820678
ILMN_1802181	9	9q34.3	TUBBP5	tubulin beta pseudogene 5	643224	0.810524	0.0170335	0.848184
ILMN_3271138	8	8q13.1	TCF24	transcription factor 24	100129654	0.750536	0.01793	0.854532
ILMN_3309664	14	14q32.31	MIR300	microRNA 300	100126297	0.740001	0.00532479	0.837338
ILMN_1654246	19	19p13.3	SIRT6	sirtuin 6	51548	0.720059	0.0126365	0.837338
ILMN_2102422	7	7q36.1	ABCB8	ATP binding cassette subfamily B member 8	11194	0.713322	0.0192427	0.873833
ILMN_1800540	1	1q32.2	CD55	CD55 molecule (Cromer blood group)	1604	0.708902	0.000512237	0.819913
ILMN_1798129	4	4p16.1	TRMT44	tRNA methyltransferase 44 homolog	152992	0.697513	0.00292616	0.820678
ILMN_1713162	1	1p13.3	GSTM2	glutathione S-transferase mu 2	2946	0.683193	0.00250802	0.820678
ILMN_1804361	10	10q24.32	SUFU	SUFU negative regulator of hedgehog signaling	51684	0.67878	0.000542492	0.819913
ILMN_1697800	16	16q22.1	C16orf86	chromosome 16 open reading frame 86	388284	0.67506	0.00426137	0.837338
ILMN_1799628	17	17q21.31	NBR1	NBR1 autophagy cargo receptor	4077	0.666437	0.0182615	0.860688
ILMN_1757754	12	12q24.23	SUDS3	SDS3 homolog, SIN3A corepressor complex component	64426	0.665671	0.0134224	0.837338
ILMN_1783973	17	17q25.3	TMEM105	TMEM105 long non-coding RNA	284186	0.659626	0.00327506	0.825351
ILMN_1807535	17	17p13.3	YWHAE	tyrosine 3-monooxygenase/tryptophan 5-monooxygenase activation protein epsilon	7531	0.638524	0.0202418	0.878608
ILMN_1777519	12	12q13.13	ITGB7	integrin subunit beta 7	3695	0.633469	0.006165	0.837338
ILMN_2163315	5	5q35.3	PRELID1	PRELI domain containing 1	27166	0.632798	0.0264055	0.883778
ILMN_2324734	6	6q23.2	EYA4	EYA transcriptional coactivator and phosphatase 4	2070	0.624455	0.0150868	0.837338
ILMN_2172588	8	8p11.21	IKBKB	inhibitor of nuclear factor kappa B kinase subunit beta	3551	0.624445	0.00178135	0.820083
ILMN_1716368	4	4q35.1	PRIMPOL	primase and DNA directed polymerase	201973	0.622029	0.000109145	0.819913
ILMN_1739238	X	Xq28	L1CAM	L1 cell adhesion molecule	3897	0.621249	0.00715914	0.837338
ILMN_1651636	19	19q13.2	CYP2A13	cytochrome P450 family 2 subfamily A member 13	1553	0.620793	0.000585736	0.819913
ILMN_1791679	2	2q36.3	DNER	delta/notch like EGF repeat containing	92737	0.620638	0.00170392	0.820083
ILMN_2190266	1	1p35.2	TMEM234	transmembrane protein 234	56063	0.619512	0.00115315	0.819913
ILMN_1660027	1	1q23.3	FCGR2B	Fc fragment of IgG receptor IIb	2213	0.616992	0.0263715	0.883778
ILMN_1798448	X	Xq28	IDS	iduronate 2-sulfatase	3423	0.615064	0.00917109	0.837338
ILMN_1658677	12	12q13.3	DTX3	deltex E3 ubiquitin ligase 3	196403	0.610308	0.0101119	0.837338
ILMN_2367186	X	Xp22.2	PIGA	phosphatidylinositol glycan anchor biosynthesis class A	5277	0.603779	0.000484007	0.819913
ILMN_1700169	15	15q22.31	INTS14	integrator complex subunit 14	81556	0.601202	0.000602351	0.819913
ILMN_2183389	11	11q12.3	TTC9C	tetratricopeptide repeat domain 9C	283237	0.599294	0.00205106	0.820678
ILMN_1767839	8	8q24.3	ZFP41	ZFP41 zinc finger protein	286128	0.598974	0.0126281	0.837338
ILMN_1654875	19	19q13.2	CLC	Charcot-Leyden crystal galectin	1178	0.597831	0.00071343	0.819913
ILMN_3247737	22	22q12.2	RFPL1	ret finger protein like 1	5988	0.5873	0.000846904	0.819913
ILMN_1806728	2	2q37.3	TRAF3IP1	TRAF3 interacting protein 1	26146	0.58713	0.00239497	0.820678
ILMN_1781416	10	10q24.1	FRAT1	FRAT regulator of WNT signaling pathway 1	10023	0.584367	0.00956752	0.837338
ILMN_2085525	11	11q21	SNORA32	small nucleolar RNA, H/ACA box 32	692063	0.584226	0.00231992	0.820678
ILMN_1709645	17	17q25.3	CBX2	chromobox 2	84733	0.584113	0.00816451	0.837338
ILMN_1756685	8	8q24.12	DEPTOR	DEP domain containing MTOR interacting protein	64798	0.576476	0.010163	0.837338
ILMN_1801262	14	14q24.1	RAD51B	RAD51 paralog B	5890	0.576324	0.0130989	0.837338
ILMN_1673886	21	21q22.13	SIM2	SIM bHLH transcription factor 2	6493	0.570329	0.0183996	0.860883
ILMN_1775327	15	15q23	PKM	pyruvate kinase M1/2	5315	0.567089	0.0250054	0.883147
ILMN_2250445	22	22q12.2	SMTN	smoothelin	6525	0.565995	0.00500477	0.837338
ILMN_1798636	3	3p25.2	RPL32	ribosomal protein L32	6161	0.564313	0.022674	0.881578
ILMN_2146648	12	12p13.2	PRB3	proline rich protein BstNI subfamily 3	5544	0.564202	0.00219579	0.820678
ILMN_2361185	8	8q24.22	PHF20L1	PHD finger protein 20 like 1	51105	0.562163	0.0374232	0.906174
ILMN_1701637	22	22q13.31	SULT4A1	sulfotransferase family 4A member 1	25830	0.561774	0.00321798	0.825351
ILMN_1780783	17	17q12	SOCS7	suppressor of cytokine signaling 7	30837	0.556883	0.00231955	0.820678
ILMN_1659744	19	19q13.33	PRMT1	protein arginine methyltransferase 1	3276	0.553445	0.00106017	0.819913
ILMN_2298958	9	9q33.2	MRRF	mitochondrial ribosome recycling factor	92399	0.551553	0.0180423	0.855075
ILMN_2048633	19	19p13.2	LRRC8E	leucine rich repeat containing 8 VRAC subunit E	80131	0.551109	0.0252798	0.883147
ILMN_1658702	6	6p22.1	H2BC11	H2B clustered histone 11	8970	0.551029	0.00166827	0.820083
ILMN_1685168	12	12q23.3	RFX4	regulatory factor X4	5992	0.549227	0.00236465	0.820678
ILMN_1704043	2	2q37.3	PRR21	proline rich 21	643905	0.544806	0.0295465	0.883778
ILMN_2131882	2	2p22.3	DPY30	dpy-30 histone methyltransferase complex regulatory subunit	84661	0.543578	0.0196537	0.875175
ILMN_2296011	21	21q22.2	BRWD1	bromodomain and WD repeat domain containing 1	54014	0.543573	0.0158827	0.837338
ILMN_1653719	13	13q33.1	ITGBL1	integrin subunit beta like 1	9358	0.542542	0.0239777	0.883147
ILMN_1707286	12	12p13.1	PLBD1	phospholipase B domain containing 1	79887	0.542471	0.00370104	0.837338
ILMN_2174380	1	1q42.2	MAP3K21	mitogen-activated protein kinase kinase kinase 21	84451	0.541591	0.0115974	0.837338
ILMN_2208413	2	2q22.2-q22.3	ARHGAP15	Rho GTPase activating protein 15	55843	0.541357	0.0465185	0.919151
ILMN_1906482	3	3q22.1	COL6A5	collagen type VI alpha 5 chain	256076	0.540737	0.00273553	0.820678
ILMN_1697405	2	2q33.1	PLCL1	phospholipase C like 1 (inactive)	5334	0.539524	0.00245834	0.820678
ILMN_2410826	12	12q24.13	OAS1	2'-5'-oligoadenylate synthetase 1	4938	0.539402	0.0142765	0.837338
ILMN_1681230	19	19p13.2	MRPL4	mitochondrial ribosomal protein L4	51073	0.539291	0.00372176	0.837338
ILMN_2122926	19	19q13.42	VN1R2	vomeronasal 1 receptor 2	317701	0.538172	0.0333477	0.895639
ILMN_1713835	9	9p13.3	ENHO	energy homeostasis associated	375704	0.535215	0.000286959	0.819913
ILMN_1709800	7	7q11.23	POMZP3	POM121 and ZP3 fusion	22932	0.534448	0.00687519	0.837338
ILMN_1670462	7	7p12.3	HUS1	HUS1 checkpoint clamp component	3364	0.533614	0.0134694	0.837338
ILMN_2391976	8	8q24.3	SLC45A4	solute carrier family 45 member 4	57210	0.532576	0.0026758	0.820678
ILMN_1804568	5	5q14.1	HOMER1	homer scaffold protein 1	9456	0.532042	0.0029352	0.820678
ILMN_1727127	14	14q23.1	PPM1A	protein phosphatase, Mg2+/Mn2+ dependent 1A	5494	0.529945	0.00770861	0.837338
ILMN_1786473	9	9p24.3	FOXD4	forkhead box D4	2298	0.529166	0.00912527	0.837338
ILMN_3186782	7	7p22.3	LOC100128653	uncharacterized LOC100128653	100128653	0.528605	0.000565308	0.819913
ILMN_2123550	11	11q24.2	OR8B12	olfactory receptor family 8 subfamily B member 12	219858	0.528371	0.00759522	0.837338
ILMN_1678564	1	1p36.33	DVL1	dishevelled segment polarity protein 1	1855	0.527817	0.00869933	0.837338
ILMN_1672081	10	10q24.33	NEURL1	neuralized E3 ubiquitin protein ligase 1	9148	0.527767	0.027576	0.883778
ILMN_2408851	1	1q23.3	ARHGAP30	Rho GTPase activating protein 30	257106	0.527125	0.00290203	0.820678
ILMN_1766128	1	1p36.31	THAP3	THAP domain containing 3	90326	0.52682	0.00282379	0.820678
ILMN_2188966	16	16p13.3	IGFALS	insulin like growth factor binding protein acid labile subunit	3483	0.526436	0.0285708	0.883778
ILMN_1745593	1	1p36.11	STMN1	stathmin 1	3925	0.523233	0.0182743	0.860688
ILMN_2179533	6	6p21.33	C4A	complement C4A (Rodgers blood group)	720	0.518373	0.0270575	0.883778
ILMN_3239922	17	17q23.3	TCAM1P	testicular cell adhesion molecule 1, pseudogene	146771	0.517919	0.0283034	0.883778
ILMN_1699491	1	1p32.3	DMRTA2	DMRT like family A2	63950	0.516185	0.00813261	0.837338
ILMN_1805645	12	12q21.31	TMTC2	transmembrane O-mannosyltransferase targeting cadherins 2	160335	0.513688	0.0319191	0.894622
ILMN_1694194	19	19q13.33	SCAF1	SR-related CTD associated factor 1	58506	0.512562	0.0147918	0.837338
ILMN_2228845	5	5p12	CCL28	C-C motif chemokine ligand 28	56477	0.510729	0.0177936	0.854532
ILMN_1698745	3	3q25.1	CLRN1	clarin 1	7401	0.510611	0.00809226	0.837338
ILMN_1800002	7	7q11.23	SSC4D	scavenger receptor cysteine rich family member with 4 domains	136853	0.508594	0.013416	0.837338
ILMN_1788531	9	9p13.3	SIT1	signaling threshold regulating transmembrane adaptor 1	27240	0.505753	0.0368027	0.90179
ILMN_1706590	19	19p13.3	MLLT1	MLLT1 super elongation complex subunit	4298	0.503336	0.0100162	0.837338
ILMN_1809947	4	4q27	SMIM43	small integral membrane protein 43	132332	0.502978	0.0467135	0.919151
ILMN_1723139	2	2q24.1	GPD2	glycerol-3-phosphate dehydrogenase 2	2820	0.502956	0.00884847	0.837338
ILMN_2387496	1	1p11.2	PFN1P2	profilin 1 pseudogene 2	767846	0.500452	0.00183036	0.820083
ILMN_1654074	17	17q21.33	ITGA3	integrin subunit alpha 3	3675	0.499856	0.0292235	0.883778
ILMN_2300894	20	20q13.33	KCNQ2	potassium voltage-gated channel subfamily Q member 2	3785	0.499234	0.0142356	0.837338
ILMN_1689474	7	7q11.23	PMS2P5	PMS1 homolog 2, mismatch repair system component pseudogene 5	5383	0.498861	0.0131873	0.837338
ILMN_1874577	12	12q24.32	LINC02372	long intergenic non-protein coding RNA 2372	440117	0.494894	0.00909029	0.837338
ILMN_1712836	6	6p21.33	VWA7	von Willebrand factor A domain containing 7	80737	0.494684	0.0152213	0.837338
ILMN_1772189	X	Xq28	ABCD1	ATP binding cassette subfamily D member 1	215	0.492981	0.00241104	0.820678
ILMN_1727199	6	6p21.1	KLC4	kinesin light chain 4	89953	0.491841	0.00222587	0.820678
ILMN_3244611	17	17q25.1	MXRA7	matrix remodeling associated 7	439921	0.489404	0.00678626	0.837338
ILMN_1839422	8	8q24.3	JRK	Jrk helix-turn-helix protein	8629	0.489356	0.0477151	0.919151
ILMN_2340259	1	1p31.3	PDE4B	phosphodiesterase 4B	5142	0.489068	0.0151457	0.837338
ILMN_1783149	10	10q22.1	CDH23	cadherin related 23	64072	0.488035	0.00987321	0.837338
ILMN_1728001	5	5q12.3	SREK1IP1	SREK1 interacting protein 1	285672	0.486915	0.0334495	0.895639
ILMN_2046315	16	16q23.1	GABARAPL2	GABA type A receptor associated protein like 2	11345	0.486817	0.0273958	0.883778
ILMN_2255605	6	6q25.3	TULP4	TUB like protein 4	56995	0.486667	0.0307061	0.886772
ILMN_1696585	20	20p12.3	FERMT1	fermitin family member 1	55612	0.485957	0.00429902	0.837338
ILMN_2290251	17	17q25.1	FBF1	Fas binding factor 1	85302	0.485197	0.0138449	0.837338
ILMN_1776263	5	5q13.2	TMEM174	transmembrane protein 174	134288	0.485084	0.0259455	0.883778
ILMN_1667433	X	Xq28	HMGB3	high mobility group box 3	3149	0.483215	0.00899114	0.837338
ILMN_1729639	6	6q25.3	CLDN20	claudin 20	49861	0.4806	0.00710207	0.837338
ILMN_1766200	10	10q24.33	CALHM2	calcium homeostasis modulator family member 2	51063	0.479376	0.0114347	0.837338
ILMN_1688022	20	20p11.21	CST5	cystatin D	1473	0.478935	0.000612379	0.819913
ILMN_1739154	3	3q13.31	LSAMP	limbic system associated membrane protein	4045	0.478714	0.0125036	0.837338
ILMN_2120340	19	19q13.33	RUVBL2	RuvB like AAA ATPase 2	10856	0.477601	0.012993	0.837338
ILMN_2401761	4	4q22.1	NUDT9	nudix hydrolase 9	53343	0.475408	0.00880125	0.837338
ILMN_2361614	2	2p16.1	CCDC85A	coiled-coil domain containing 85A	114800	0.47534	0.0121272	0.837338
ILMN_1678080	11	11q13.1	FKBP2	FKBP prolyl isomerase 2	2286	0.473966	0.0351303	0.897431
ILMN_3242067	3	3q22.1	SNORA58	small nucleolar RNA, H/ACA box 58	677836	0.470844	0.00487772	0.837338
ILMN_1666827	4	4q35.1	TRAPPC11	trafficking protein particle complex 11	60684	0.47076	0.0110798	0.837338
ILMN_2224444	4	4q35.1	SNX25	sorting nexin 25	83891	0.469496	0.0290803	0.883778
ILMN_1698166	21	21q21.1	C21orf91	chromosome 21 open reading frame 91	54149	0.468694	0.00656943	0.837338
ILMN_2395314	19	19p13.12	PRKACA	protein kinase cAMP-activated catalytic subunit alpha	5566	0.466839	0.045983	0.919151
ILMN_1727633	3	3q13.13	NECTIN3	nectin cell adhesion molecule 3	25945	0.464432	0.00499421	0.837338
ILMN_3183806	1	1q32.1	SYT2	synaptotagmin 2	127833	0.463925	0.0376865	0.906174
ILMN_1787292	5	5q11.2	CDC20B	cell division cycle 20B	166979	0.463871	0.0211683	0.881578
ILMN_1682491	21	21q22.3	PRDM15	PR/SET domain 15	63977	0.462958	0.0015282	0.820083
ILMN_1778079	17	17q22	SEPTIN4	septin 4	5414	0.461488	0.0124104	0.837338
ILMN_3222586	1	1p36.33	LINC00115	long intergenic non-protein coding RNA 115	79854	0.46145	0.033139	0.895639
ILMN_1788421	20	20q13.12	KCNK15	potassium two pore domain channel subfamily K member 15	60598	0.461389	0.03251	0.895639
ILMN_1736834	3	3q26.2	SKIL	SKI like proto-oncogene	6498	0.459988	0.0143079	0.837338
ILMN_1744217	10	10q23.31	HTR7	5-hydroxytryptamine receptor 7	3363	0.459859	0.00333072	0.826113
ILMN_3237256	4	4p13	BEND4	BEN domain containing 4	389206	0.459844	0.00462356	0.837338
ILMN_1810738	5	5q31.3	YIPF5	Yip1 domain family member 5	81555	0.459527	0.0363822	0.90179
ILMN_1696316	11	11q13.3	CPT1A	carnitine palmitoyltransferase 1A	1374	0.458692	0.0245318	0.883147
ILMN_1713449	12	12q24.21	TBX3	T-box transcription factor 3	6926	0.458494	0.00973711	0.837338
ILMN_2404906	3	3p24.3	SGO1	shugoshin 1	151648	0.458211	0.0220984	0.881578
ILMN_2295844	12	12p13.31	VAMP1	vesicle associated membrane protein 1	6843	0.455587	0.00892637	0.837338
ILMN_1686227	9	9q21.2	GNA14	G protein subunit alpha 14	9630	0.454376	0.00510718	0.837338
ILMN_1666280	17	17q22	COX11	cytochrome c oxidase copper chaperone COX11	1353	0.45425	0.0336892	0.895639
ILMN_1811836	2	2p21	DYNC2LI1	dynein cytoplasmic 2 light intermediate chain 1	51626	0.45412	0.00656605	0.837338
ILMN_1720496	11	11q22.3	GUCY1A2	guanylate cyclase 1 soluble subunit alpha 2	2977	0.453456	0.0218646	0.881578
ILMN_2383964	14	14q32.33	CDCA4	cell division cycle associated 4	55038	0.451882	0.03705	0.903349
ILMN_1722538	20	20q11.21	DEFB123	defensin beta 123	245936	0.451127	0.046681	0.919151
ILMN_1805158	1	1q41	TAF1A	TATA-box binding protein associated factor, RNA polymerase I subunit A	9015	0.450249	0.00172719	0.820083
ILMN_1777487	14	14q32.31	ZNF839	zinc finger protein 839	55778	0.45015	0.0161534	0.837338
ILMN_1804886	1	1p36.12	HTR1D	5-hydroxytryptamine receptor 1D	3352	0.449983	0.00113543	0.819913
ILMN_3309064	17	17q21.32	MIR10A	microRNA 10a	406902	0.449892	0.005335	0.837338
ILMN_3240433	22	22q11.23	GSTT2B	glutathione S-transferase theta 2B	653689	0.44904	0.00429411	0.837338
ILMN_1717852	17	17q25.1	USH1G	USH1 protein network component sans	124590	0.448674	0.00426828	0.837338
ILMN_2313158	3	3q25.1-q25.2	MBNL1	muscleblind like splicing regulator 1	4154	0.448055	0.0120891	0.837338
ILMN_2415162	16	16p11.2	SEPTIN1	septin 1	1731	0.447716	0.0122566	0.837338
ILMN_1701264	2	2p16.2	TSPYL6	TSPY like 6	388951	0.445434	0.0270997	0.883778
ILMN_1674046	10	10q11.23	TMEM273	transmembrane protein 273	170371	0.444044	0.029733	0.884921
ILMN_2385298	1	1q32.1	PFKFB2	6-phosphofructo-2-kinase/fructose-2,6-biphosphatase 2	5208	0.443376	0.00814586	0.837338
ILMN_1684576	8	8p23.3	CLN8	CLN8 transmembrane ER and ERGIC protein	2055	0.443035	0.00847127	0.837338
ILMN_1814333	3	3q26.1	SERPINI1	serpin family I member 1	5274	0.442905	0.0175861	0.85282
ILMN_1656118	19	19p13.3	ZBTB7A	zinc finger and BTB domain containing 7A	51341	0.441471	0.0389887	0.906174
ILMN_1799669	6	6p21.33	PSORS1C1	psoriasis susceptibility 1 candidate 1	170679	0.440572	0.0360591	0.901424
ILMN_1745499	X	Xp11.23	UXT	ubiquitously expressed prefoldin like chaperone	8409	0.440202	0.014658	0.837338
ILMN_3238123	19	19p13.2	ZNF844	zinc finger protein 844	284391	0.438384	0.00195299	0.820678
ILMN_1761464	5	5q33.1	CD74	CD74 molecule	972	0.43833	0.00190219	0.820678
ILMN_2290776	2	2p23.3	AGBL5	ATP/GTP binding protein like 5	60509	0.437147	0.0137645	0.837338
ILMN_1671171	22	22q11.1-q11.21	CECR2	CECR2 histone acetyl-lysine reader	27443	0.437007	0.0100159	0.837338
ILMN_1690066	4	4q22.1	TIGD2	tigger transposable element derived 2	166815	0.436242	0.00147449	0.819913
ILMN_1808219	16	16q12.1	HEATR3	HEAT repeat containing 3	55027	0.436161	0.0116747	0.837338
ILMN_2073263	11	11q24.2	MSANTD2	Myb/SANT DNA binding domain containing 2	79684	0.436154	0.049643	0.920838
ILMN_2411116	6	6q27	CEP43	centrosomal protein 43	11116	0.434232	0.00379783	0.837338
ILMN_1768954	X	Xp11.22	RIBC1	RIB43A domain with coiled-coils 1	158787	0.434178	0.0128527	0.837338
ILMN_3193299	21	21q22.3	LINC01547	long intergenic non-protein coding RNA 1547	84536	0.431343	0.0206315	0.878608
ILMN_1685104	9	9q31.3	ABITRAM	actin binding transcription modulator	54942	0.43103	0.00281205	0.820678
ILMN_2379063	16	16q21	NDRG4	NDRG family member 4	65009	0.430456	0.0238252	0.883147
ILMN_1765124	4	4q28.3	LINC00616	long intergenic non-protein coding RNA 616	641365	0.430431	0.0232438	0.881578
ILMN_1814282	15	15q26.1	AEN	apoptosis enhancing nuclease	64782	0.429715	0.00144423	0.819913
ILMN_1750158	17	17q25.1	ACOX1	acyl-CoA oxidase 1	51	0.429488	0.00619905	0.837338
ILMN_1797585	2	2q32.3	MYO1B	myosin IB	4430	0.428555	0.0170966	0.848715
ILMN_1698015	22	22q11.21	TBX1	T-box transcription factor 1	6899	0.428434	0.0140101	0.837338
ILMN_1764321	14	14q24.3	ACOT4	acyl-CoA thioesterase 4	122970	0.428395	0.0308938	0.88832
ILMN_3236838	15	15q15.1	JMJD7	jumonji domain containing 7	100137047	0.427761	0.0151469	0.837338
ILMN_1710325	13	13q22.3	SCEL	sciellin	8796	0.427232	0.0289744	0.883778
ILMN_1776079	19	19q13.42	CACNG8	calcium voltage-gated channel auxiliary subunit gamma 8	59283	0.426353	0.0123476	0.837338
ILMN_2305116	1	1p31.1	CTH	cystathionine gamma-lyase	1491	0.426175	0.0352963	0.897431
ILMN_1781468	1	1p34.2	SMAP2	small ArfGAP2	64744	0.424611	0.0402148	0.906174
ILMN_1700727	10	10p15.2	KLF6	Kruppel like factor 6	1316	0.422932	0.0162139	0.837338
ILMN_1680223	7	7q31.1	PNPLA8	patatin like phospholipase domain containing 8	50640	0.4227	0.0149282	0.837338
ILMN_1796927	X	Xq26.3	ZNF449	zinc finger protein 449	203523	0.422661	0.00425196	0.837338
ILMN_3246219	7	7p22.3	PRKAR1B	protein kinase cAMP-dependent type I regulatory subunit beta	5575	0.422651	0.0494639	0.920838
ILMN_1761875	21	21q22.2	SH3BGR	SH3 domain binding glutamate rich protein	6450	0.422453	0.0318851	0.894622
ILMN_1697503	5	5q11.2	DHX29	DExH-box helicase 29	54505	0.422399	0.000977146	0.819913
ILMN_2272967	14	14q21.1	TRAPPC6B	trafficking protein particle complex 6B	122553	0.421878	0.0127849	0.837338
ILMN_3251486	3	3q13.32-q13.33	ARHGAP31	Rho GTPase activating protein 31	57514	0.421378	0.00753164	0.837338
ILMN_1676288	17	17q21.31	ACBD4	acyl-CoA binding domain containing 4	79777	0.419083	0.0389308	0.906174
ILMN_1714805	14	14q31.3	ZC3H14	zinc finger CCCH-type containing 14	79882	0.418614	0.011121	0.837338
ILMN_1696151	3	3p21.31	MON1A	MON1 homolog A, secretory trafficking associated	84315	0.41856	0.018007	0.855075
ILMN_2056932	17	17p13.1	SPEM1	spermatid maturation 1	374768	0.418506	0.00679509	0.837338
ILMN_2045453	1	1q31.3	CFHR2	complement factor H related 2	3080	0.41846	0.0158016	0.837338
ILMN_1718982	11	11q12.3	BEST1	bestrophin 1	7439	0.417828	0.0345473	0.895639
ILMN_2358265	13	13q34	F7	coagulation factor VII	2155	0.417104	0.006258	0.837338
ILMN_1804384	c("X", "Y")	c("Xp22.3", "Yp11.3")	ASMTL	acetylserotonin O-methyltransferase like	8623	0.41596	0.0129101	0.837338
ILMN_1798534	17	17p13.3	OR3A1	olfactory receptor family 3 subfamily A member 1	4994	0.414474	0.0170132	0.848184
ILMN_3215374	5	5q11.2	LOC257396	uncharacterized LOC257396	257396	0.413505	0.0390778	0.906174
ILMN_1700671	6	6p21.31	ETV7	ETS variant transcription factor 7	51513	0.412985	0.0231082	0.881578
ILMN_2125010	7	7p15.2	SKAP2	src kinase associated phosphoprotein 2	8935	0.412629	0.00959834	0.837338
ILMN_1707173	1	1q42.13	H3-4	H3.4 histone	8290	0.411862	0.0444271	0.919151
ILMN_2295518	X	Xp11.21	TRO	trophinin	7216	0.411771	0.000569075	0.819913
ILMN_1808290	X	Xq26.2	FIRRE	firre intergenic repeating RNA element	286467	0.41067	0.0286918	0.883778
ILMN_1654893	15	15q24.1	SCAMP2	secretory carrier membrane protein 2	10066	0.410118	0.0369787	0.90225
ILMN_2397795	13	13q22.3	SLAIN1	SLAIN motif family member 1	122060	0.409728	0.0141239	0.837338
ILMN_2161330	6	6p21.31	SPDEF	SAM pointed domain containing ETS transcription factor	25803	0.409101	0.0157094	0.837338
ILMN_2064694	11	11p15.4	STIM1	stromal interaction molecule 1	6786	0.408724	0.000744334	0.819913
ILMN_2202967	5	5q11.2	ARL15	ADP ribosylation factor like GTPase 15	54622	0.408718	0.01963	0.875175
ILMN_1657855	7	7q22.1	ACTL6B	actin like 6B	51412	0.408209	0.0473772	0.919151
ILMN_1732830	17	17p13.3	RAP1GAP2	RAP1 GTPase activating protein 2	23108	0.407403	0.0217681	0.881578
ILMN_2149292	3	3p25.2	TMEM40	transmembrane protein 40	55287	0.406823	0.0354275	0.897431
ILMN_1695058	X	Xp11.23	SLC38A5	solute carrier family 38 member 5	92745	0.406314	0.0429772	0.917649
ILMN_1793621	10	10q24.2	ZFYVE27	zinc finger FYVE-type containing 27	118813	0.405895	0.0278699	0.883778
ILMN_3243986	1	1p11.2	FAM72B	family with sequence similarity 72 member B	653820	0.404716	0.0193137	0.873833
ILMN_1783806	6	6p22.3	DTNBP1	dystrobrevin binding protein 1	84062	0.404225	0.0140337	0.837338
ILMN_1742775	16	16q23.1	ZNRF1	zinc and ring finger 1	84937	0.404109	0.0389549	0.906174
ILMN_1809490	2	2q21.2	NCKAP5	NCK associated protein 5	344148	0.403655	0.0356593	0.898287
ILMN_1735231	19	19p13.13-p13.12	ZSWIM4	zinc finger SWIM-type containing 4	65249	0.402232	0.00644501	0.837338
ILMN_1748004	9	9q34.3	PAEP	progestagen associated endometrial protein	5047	0.402213	0.00599915	0.837338
ILMN_2334112	4	4p16.3	NSD2	nuclear receptor binding SET domain protein 2	7468	0.401917	0.0496191	0.920838
ILMN_1780460	9	9q21.13	CARNMT1	carnosine N-methyltransferase 1	138199	0.401709	0.0366164	0.90179
ILMN_1703459	17	17q21.32	WNT9B	Wnt family member 9B	7484	0.401131	0.0323878	0.895639
ILMN_2412849	17	17p11.2	SLC5A10	solute carrier family 5 member 10	125206	0.401045	0.0341036	0.895639
ILMN_1729167	15	15q25.2	EFL1	elongation factor like GTPase 1	79631	0.399871	0.00699597	0.837338
ILMN_1711414	5	5q13.2	MRPS27	mitochondrial ribosomal protein S27	23107	0.399461	0.0123814	0.837338
ILMN_1762337	7	7p21.1	MACC1	MET transcriptional regulator MACC1	346389	0.398753	0.0232875	0.881578
ILMN_2110271	19	19p13.2	OLFM2	olfactomedin 2	93145	0.398275	0.0354797	0.897431
ILMN_1653125	17	17p13.1	PER1	period circadian regulator 1	5187	0.397432	0.00902203	0.837338
ILMN_3223826	17	17p13.2	SPNS2	sphingolipid transporter 2	124976	0.397265	0.00586841	0.837338
ILMN_1760506	10	10p11.1	HSD17B7P2	hydroxysteroid 17-beta dehydrogenase 7 pseudogene 2	158160	0.397185	0.035836	0.901125
ILMN_1768877	10	10p11.22	CCDC7	coiled-coil domain containing 7	79741	0.396987	0.00218522	0.820678
ILMN_1715532	6	6q25.1	AKAP12	A-kinase anchoring protein 12	9590	0.396895	0.00560354	0.837338
ILMN_1740762	17	17q12	GRB7	growth factor receptor bound protein 7	2886	0.396773	0.00904244	0.837338
ILMN_1658607	1	1p31.3	DLEU2L	deleted in lymphocytic leukemia 2 like	79469	0.396587	0.0216943	0.881578
ILMN_2128428	5	5p13.1	DAB2	DAB adaptor protein 2	1601	0.396371	0.013809	0.837338
ILMN_1777949	1	1q21.3	SPRR4	small proline rich protein 4	163778	0.396226	0.0112047	0.837338
ILMN_1770610	2	2q13	MERTK	MER proto-oncogene, tyrosine kinase	10461	0.395979	0.0319908	0.894622
ILMN_1813019	1	1p31.1	DNAJB4	DnaJ heat shock protein family (Hsp40) member B4	11080	0.394811	0.0398171	0.906174
ILMN_2339691	11	11q13.1	SYVN1	synoviolin 1	84447	0.394557	0.0120565	0.837338
ILMN_1711465	8	8p11.21-p11.1	HGSNAT	heparan-alpha-glucosaminide N-acetyltransferase	138050	0.394457	0.0108806	0.837338
ILMN_1683497	5	5q11.2	MCIDAS	multiciliate differentiation and DNA synthesis associated cell cycle protein	345643	0.394193	0.00207428	0.820678
ILMN_1686623	5	5q32	CSF1R	colony stimulating factor 1 receptor	1436	0.39402	0.00776455	0.837338
ILMN_2325574	15	15q15.3	GOLM2	golgi membrane protein 2	113201	0.393701	0.0351858	0.897431
ILMN_1704550	8	8q22.3	AZIN1	antizyme inhibitor 1	51582	0.393474	0.0446812	0.919151
ILMN_1717403	9	9p13.3	ARHGEF39	Rho guanine nucleotide exchange factor 39	84904	0.392786	0.0293878	0.883778
ILMN_1661066	X	Xq26.3	SMIM10L2B	small integral membrane protein 10 like 2B	644596	0.392562	0.00474186	0.837338
ILMN_1789732	20	20q13.13	PEDS1	plasmanylethanolamine desaturase 1	387521	0.392203	0.00519209	0.837338
ILMN_2332250	1	1p36.31	ACOT7	acyl-CoA thioesterase 7	11332	0.392118	0.0304256	0.886772
ILMN_1778308	2	2q36.3	COL4A4	collagen type IV alpha 4 chain	1286	0.390531	0.0244638	0.883147
ILMN_2328575	21	21q22.13	CLDN14	claudin 14	23562	0.390528	0.032016	0.894622
ILMN_2159694	6	6p21.3	HLA-DRB4	major histocompatibility complex, class II, DR beta 4	3126	0.389564	0.0143585	0.837338
ILMN_1652662	7	7p12.1	GRB10	growth factor receptor bound protein 10	2887	0.389465	0.0247858	0.883147
ILMN_3235379	16	16q22.2	CALB2	calbindin 2	794	0.389245	0.00688272	0.837338
ILMN_1700759	6	6q13	RIMS1	regulating synaptic membrane exocytosis 1	22999	0.388738	0.0390916	0.906174
ILMN_1692790	1	1p31.3	ITGB3BP	integrin subunit beta 3 binding protein	23421	0.387186	0.0260056	0.883778
ILMN_2330267	4	4q31.21	ABCE1	ATP binding cassette subfamily E member 1	6059	0.38717	0.0275042	0.883778
ILMN_1772958	20	20q11.22	MAP1LC3A	microtubule associated protein 1 light chain 3 alpha	84557	0.386405	0.016704	0.844222
ILMN_2260392	7	7q36.1-q36.2	ACTR3B	actin related protein 3B	57180	0.386231	0.0104214	0.837338
ILMN_1656486	2	2q32.1	DNAJC10	DnaJ heat shock protein family (Hsp40) member C10	54431	0.386157	0.0126644	0.837338
ILMN_1812776	1	1q42.11	FBXO28	F-box protein 28	23219	0.385369	0.026072	0.883778
ILMN_2056479	10	10q26.3	GLRX3	glutaredoxin 3	10539	0.384668	0.0165903	0.839918
ILMN_1712859	1	1q42.2	FAM89A	family with sequence similarity 89 member A	375061	0.383777	0.0480522	0.919151
ILMN_1711810	2	2q35	PNKD	PNKD metallo-beta-lactamase domain containing	25953	0.383539	0.0148512	0.837338
ILMN_1672575	6	6p21.31	SLC26A8	solute carrier family 26 member 8	116369	0.3833	0.0142048	0.837338
ILMN_1781999	7	7q36.1	ABCF2	ATP binding cassette subfamily F member 2	10061	0.383187	0.00902702	0.837338
ILMN_1794187	13	13q22.3	FBXL3	F-box and leucine rich repeat protein 3	26224	0.381399	0.00872931	0.837338
ILMN_1720484	3	3p22.3	CRTAP	cartilage associated protein	10491	0.381296	0.0186638	0.867187
ILMN_1806305	8	8p11.21	POMK	protein O-mannose kinase	84197	0.381185	0.00275294	0.820678
ILMN_2195914	8	8q12.3	GGH	gamma-glutamyl hydrolase	8836	0.381159	0.0022801	0.820678
ILMN_1749083	17	17p11.2	FAM27E5	family with sequence similarity E5	284123	0.380986	0.0445174	0.919151
ILMN_1690894	1	1p22.1	HSP90B3P	heat shock protein 90 beta family member 3, pseudogene	343477	0.380756	0.017517	0.85282
ILMN_1699574	10	10p11.22	NRP1	neuropilin 1	8829	0.380108	0.0270312	0.883778
ILMN_2385647	3	3p21.2	ALAS1	5'-aminolevulinate synthase 1	211	0.379066	0.0356407	0.898287
ILMN_1772278	2	2q24.2	TANC1	tetratricopeptide repeat, ankyrin repeat and coiled-coil containing 1	85461	0.378825	0.0147352	0.837338
ILMN_1788268	18	18p11.22	NAPG	NSF attachment protein gamma	8774	0.378405	0.0311862	0.891737
ILMN_2171640	2	2q31.1	UBR3	ubiquitin protein ligase E3 component n-recognin 3	130507	0.378329	0.028798	0.883778
ILMN_1766718	5	5q14.3	LYSMD3	LysM domain containing 3	116068	0.3782	0.0283407	0.883778
ILMN_2075292	X	Xq28	MAGEA9B	MAGE family member A9B	728269	0.378166	0.0356833	0.898287
ILMN_1700547	18	18q11.2	CHST9	carbohydrate sulfotransferase 9	83539	0.377126	0.00891749	0.837338
ILMN_1714737	6	6q22.31	ASF1A	anti-silencing function 1A histone chaperone	25842	0.37686	0.0368615	0.901822
ILMN_1734630	15	15q25.3	ALPK3	alpha kinase 3	57538	0.376601	0.024229	0.883147
ILMN_2183784	11	11q23.2	TTC12	tetratricopeptide repeat domain 12	54970	0.375738	0.0200758	0.878534
ILMN_1662140	2	2q36.1	SGPP2	sphingosine-1-phosphate phosphatase 2	130367	0.375486	0.0195762	0.875175
ILMN_1776953	20	20q11.23	MYL9	myosin light chain 9	10398	0.374927	0.0268033	0.883778
ILMN_2081087	10	10q25.3	HSPA12A	heat shock protein family A (Hsp70) member 12A	259217	0.374896	0.0343486	0.895639
ILMN_2098126	17	17q12	CCL5	C-C motif chemokine ligand 5	6352	0.374316	0.0252687	0.883147
ILMN_1659257	1	1p36.22	TNFRSF8	TNF receptor superfamily member 8	943	0.373684	0.0178486	0.854532
ILMN_1702105	14	14q11.2	EFS	embryonal Fyn-associated substrate	10278	0.373601	0.0148409	0.837338
ILMN_1654414	2	2q36.1	ACSL3	acyl-CoA synthetase long chain family member 3	2181	0.373565	0.016467	0.837338
ILMN_1672114	8	8p21.3	TNFRSF10C	TNF receptor superfamily member 10c	8794	0.372946	0.032776	0.895639
ILMN_2398664	12	12q24.31	RNF34	ring finger protein 34	80196	0.372762	0.0221029	0.881578
ILMN_1652490	12	12p13.2	MANSC1	MANSC domain containing 1	54682	0.372061	0.0112327	0.837338
ILMN_1651692	5	5q35.1	STK10	serine/threonine kinase 10	6793	0.371963	0.010341	0.837338
ILMN_1685978	1	1p35.3	ATP5IF1	ATP synthase inhibitory factor subunit 1	93974	0.370699	0.0107848	0.837338
ILMN_2094266	1	1p36.31	HES2	hes family bHLH transcription factor 2	54626	0.370367	0.0155362	0.837338
ILMN_2350296	19	19q13.43	AURKC	aurora kinase C	6795	0.370313	0.0157239	0.837338
ILMN_2410113	1	1p13.2	ST7L	suppression of tumorigenicity 7 like	54879	0.370189	0.0199309	0.876452
ILMN_1714522	14	14q32.13	CLMN	calmin	79789	0.369972	0.0164497	0.837338
ILMN_1807177	9	9p21.3	FOCAD	focadhesin	54914	0.369889	0.0332064	0.895639
ILMN_2368597	1	1q25.3	SMG7	SMG7 nonsense mediated mRNA decay factor	9887	0.369621	0.0113465	0.837338
ILMN_1757536	2	2q37.1	USP40	ubiquitin specific peptidase 40	55230	0.369262	0.0435262	0.919151
ILMN_2169439	2	2q32.1	ITGAV	integrin subunit alpha V	3685	0.369051	0.00585204	0.837338
ILMN_1676689	6	6p21.32	PPT2	palmitoyl-protein thioesterase 2	9374	0.368942	0.0386542	0.906174
ILMN_2100693	17	17p12	MAP2K4	mitogen-activated protein kinase kinase 4	6416	0.368542	0.00742767	0.837338
ILMN_3244395	2	2q14.1	CBWD2	COBW domain containing 2	150472	0.368346	0.00700939	0.837338
ILMN_1669215	7	7q22.3	SRPK2	SRSF protein kinase 2	6733	0.368116	0.0224294	0.881578
ILMN_1652223	7	7q33	WDR91	WD repeat domain 91	29062	0.367733	0.0146533	0.837338
ILMN_1729509	1	1q21.3	C1orf43	chromosome 1 open reading frame 43	25912	0.367525	0.00508871	0.837338
ILMN_3244669	20	20q13.13	SNORD12B	small nucleolar RNA, C/D box 12B	100113393	0.367488	0.0395924	0.906174
ILMN_1909610	18	18q11.2	LINC01915	long intergenic non-protein coding RNA 1915	729950	0.366943	0.0088523	0.837338
ILMN_1774493	11	11q13.2	KLC2	kinesin light chain 2	64837	0.36564	0.00658232	0.837338
ILMN_1687403	22	22q11.21	MRPL40	mitochondrial ribosomal protein L40	64976	0.365542	0.00908524	0.837338
ILMN_2314244	12	12p13.31	LRRC23	leucine rich repeat containing 23	10233	0.365476	0.0112497	0.837338
ILMN_2138249	3	3p21.31	PRSS45P	serine protease 45, pseudogene	377047	0.365155	0.0308484	0.88832
ILMN_1740571	5	5q13.2	OCLN	occludin	100506658	0.365027	0.0361027	0.901424
ILMN_1703301	17	17q21.32	MRPL45P2	mitochondrial ribosomal protein L45 pseudogene 2	653479	0.364584	0.0276814	0.883778
ILMN_3245697	14	14q23.1	TOMM20L	translocase of outer mitochondrial membrane 20 like	387990	0.364038	0.0363499	0.90179
ILMN_1742859	20	20q11.22	ACSS2	acyl-CoA synthetase short chain family member 2	55902	0.363856	0.011413	0.837338
ILMN_2391891	15	15q23	MAP2K5	mitogen-activated protein kinase kinase 5	5607	0.363055	0.00990323	0.837338
ILMN_1773505	3	3p21.31	USP4	ubiquitin specific peptidase 4	7375	0.362732	0.00952081	0.837338
ILMN_1791951	21	21q22.11	KRTAP13-2	keratin associated protein 13-2	337959	0.362419	0.0313772	0.894016
ILMN_1774109	1	1p33	SKINT1L	Skint1 like (pseudogene)	391037	0.362251	0.0333215	0.895639
ILMN_1765525	7	7q11.23	RCC1L	RCC1 like	81554	0.362036	0.0201566	0.878534
ILMN_1688811	5	5q31.3	SPRY4	sprouty RTK signaling antagonist 4	81848	0.361721	0.0308938	0.88832
ILMN_1720422	4	4q21.1	G3BP2	G3BP stress granule assembly factor 2	9908	0.361423	0.0464166	0.919151
ILMN_1733863	16	16p13.3	UBALD1	UBA like domain containing 1	124402	0.361395	0.0481	0.919151
ILMN_1731070	16	16q11.2	ORC6	origin recognition complex subunit 6	23594	0.361166	0.0237062	0.883147
ILMN_3278548	8	8q21.11	RPL7	ribosomal protein L7	6129	0.36048	0.0049907	0.837338
ILMN_1887987	8	8q12.1	LINC00968	long intergenic non-protein coding RNA 968	100507632	0.35979	0.00460925	0.837338
ILMN_1651538	19	19q13.2	NUMBL	NUMB like endocytic adaptor protein	9253	0.35928	0.0334209	0.895639
ILMN_1700307	7	7p22.1	ZNF815P	zinc finger protein 815, pseudogene	401303	0.359185	0.0219565	0.881578
ILMN_1652072	5	5p12	NIM1K	NIM1 serine/threonine protein kinase	167359	0.359137	0.049636	0.920838
ILMN_1719938	17	17p13.1	FGF11	fibroblast growth factor 11	2256	0.35805	0.0210211	0.881578
ILMN_1666761	14	14q23.2	PPP2R5E	protein phosphatase 2 regulatory subunit B'epsilon	5529	0.357718	0.0110265	0.837338
ILMN_3251756	8	8p12	WRN	WRN RecQ like helicase	7486	0.357493	0.0187976	0.869054
ILMN_1736577	16	16p11.2	ZNF688	zinc finger protein 688	146542	0.357384	0.0391817	0.906174
ILMN_1719606	2	2q36.3	MFF	mitochondrial fission factor	56947	0.356943	0.0297563	0.884921
ILMN_1671642	13	13q13.3	CSNK1A1L	casein kinase 1 alpha 1 like	122011	0.356675	0.0287519	0.883778
ILMN_1798955	22	22q13.1	PLA2G6	phospholipase A2 group VI	8398	0.356368	0.0293824	0.883778
ILMN_2295620	16	16p11.2	MAZ	MYC associated zinc finger protein	4150	0.355606	0.0347373	0.895639
ILMN_1801119	18	18q21.33	BCL2	BCL2 apoptosis regulator	596	0.354713	0.0250019	0.883147
ILMN_1741265	2	2q35	CRYBA2	crystallin beta A2	1412	0.354671	0.0242684	0.883147
ILMN_2280911	7	7p14.1	VPS41	VPS41 subunit of HOPS complex	27072	0.354234	0.0280609	0.883778
ILMN_1688452	16	16p12.1	LCMT1	leucine carboxyl methyltransferase 1	51451	0.353949	0.00759058	0.837338
ILMN_3251370	7	7p15.2	HOXA4	homeobox A4	3201	0.353338	0.03061	0.886772
ILMN_3250398	16	16q21	CNGB1	cyclic nucleotide gated channel subunit beta 1	1258	0.353307	0.0127877	0.837338
ILMN_2173291	1	1p33	CYP4B1	cytochrome P450 family 4 subfamily B member 1	1580	0.353148	0.0113038	0.837338
ILMN_1800800	19	19q13.12	FFAR3	free fatty acid receptor 3	2865	0.352463	0.00740665	0.837338
ILMN_1687074	9	9q22.32-q22.33	CDC14B	cell division cycle 14B	8555	0.35227	0.027031	0.883778
ILMN_3251477	9	9p13.2	TRMT10B	tRNA methyltransferase 10B	158234	0.352138	0.0368005	0.90179
ILMN_2333367	20	20p13	FKBP1A	FKBP prolyl isomerase 1A	2280	0.351433	0.0427069	0.916202
ILMN_1743654	7	7q35	OR2A25	olfactory receptor family 2 subfamily A member 25	392138	0.351394	0.0259383	0.883778
ILMN_1688639	3	3p22.3	FBXL2	F-box and leucine rich repeat protein 2	25827	0.350684	0.0126646	0.837338
ILMN_2384496	3	3q27.3	ST6GAL1	ST6 beta-galactoside alpha-2,6-sialyltransferase 1	6480	0.350484	0.0107105	0.837338
ILMN_1801725	8	8p11.22	C8orf86	chromosome 8 open reading frame 86	389649	0.350457	0.0167828	0.844679
ILMN_1791650	5	5q15	KIAA0825	KIAA0825	285600	0.349981	0.0240414	0.883147
ILMN_1665040	3	3p24.1	RBMS3	RNA binding motif single stranded interacting protein 3	27303	0.349932	0.029477	0.883778
ILMN_1664440	15	15q15.3	TP53BP1	tumor protein p53 binding protein 1	7158	0.349899	0.00301839	0.820678
ILMN_2158713	2	2q14.1	IL36G	interleukin 36 gamma	56300	0.34986	0.008219	0.837338
ILMN_1770612	17	17q21.2	KRT15	keratin 15	3866	0.348856	0.0466974	0.919151
ILMN_1747460	22	22q13.1	TMEM184B	transmembrane protein 184B	25829	0.34811	0.0089155	0.837338
ILMN_1715069	2	2q24.2	TANK	TRAF family member associated NFKB activator	10010	0.347739	0.0271332	0.883778
ILMN_2311873	16	16p12.3	GP2	glycoprotein 2	2813	0.347609	0.0314918	0.894622
ILMN_3249406	1	1q42.13	URB2	URB2 ribosome biogenesis homolog	9816	0.347488	0.00853333	0.837338
ILMN_3276656	16	16p13.3	KCTD5	potassium channel tetramerization domain containing 5	54442	0.347409	0.0207634	0.878608
ILMN_1658821	19	19p13.12	SAMD1	sterile alpha motif domain containing 1	90378	0.347223	0.0148695	0.837338
ILMN_1769849	1	1q21.3	HORMAD1	HORMA domain containing 1	84072	0.34644	0.0353585	0.897431
ILMN_1779710	5	5q21.2-q21.3	RAB9BP1	RAB9B, member RAS oncogene family pseudogene 1	9366	0.346126	0.0233142	0.881578
ILMN_1691403	1	1p22.3	SYDE2	synapse defective Rho GTPase homolog 2	84144	0.34588	0.0468247	0.919151
ILMN_2101278	1	1q31.2	RGS18	regulator of G protein signaling 18	64407	0.345808	0.0361274	0.901424
ILMN_1724837	7	7q34	ZC3HAV1	zinc finger CCCH-type containing, antiviral 1	56829	0.345252	0.0265492	0.883778
ILMN_1692539	22	22q13.1	SH3BP1	SH3 domain binding protein 1	23616	0.344872	0.0361427	0.901424
ILMN_1815124	7	7p11.2	CHCHD2	coiled-coil-helix-coiled-coil-helix domain containing 2	51142	0.344665	0.0194292	0.875175
ILMN_2058795	8	8q22.1	CPQ	carboxypeptidase Q	10404	0.344595	0.0193993	0.875175
ILMN_1804988	14	14q32.12	MOAP1	modulator of apoptosis 1	64112	0.343962	0.0298115	0.884921
ILMN_1750706	3	3p14.2	FEZF2	FEZ family zinc finger 2	55079	0.343946	0.0490692	0.920838
ILMN_1801864	16	16p13.11	NTAN1	N-terminal asparagine amidase	123803	0.343523	0.0157668	0.837338
ILMN_1651936	12	12q24.31	KMT5A	lysine methyltransferase 5A	387893	0.343114	0.0241765	0.883147
ILMN_1654691	14	14q21.2	FKBP3	FKBP prolyl isomerase 3	2287	0.342875	0.00979848	0.837338
ILMN_1709204	12	12p13.31	CLEC4A	C-type lectin domain family 4 member A	50856	0.342843	0.0427096	0.916202
ILMN_1786532	14	14q22.2	CNIH1	cornichon family AMPA receptor auxiliary protein 1	10175	0.342096	0.0300195	0.884938
ILMN_3181296	12	12q13.13	LOC100240735	uncharacterized LOC100240735	100240735	0.341724	0.0349745	0.897431
ILMN_2362122	10	10q22.2	AP3M1	adaptor related protein complex 3 subunit mu 1	26985	0.341046	0.0223809	0.881578
ILMN_1795251	4	4q22.1	SPARCL1	SPARC like 1	8404	0.340714	0.0414096	0.91088
ILMN_1655504	12	12q24.11	IFT81	intraflagellar transport 81	28981	0.340291	0.0222583	0.881578
ILMN_1761314	20	20q11.22	NFS1	NFS1 cysteine desulfurase	9054	0.340263	0.0344611	0.895639
ILMN_1720501	17	17q24.2	ABCA9	ATP binding cassette subfamily A member 9	10350	0.339994	0.0316929	0.894622
ILMN_1711139	8	8p22	VPS37A	VPS37A subunit of ESCRT-I	137492	0.339802	0.0483236	0.919151
ILMN_1780197	16	16p13.3	TBC1D24	TBC1 domain family member 24	57465	0.339057	0.0251543	0.883147
ILMN_2206500	4	4q13.3	UGT2B4	UDP glucuronosyltransferase family 2 member B4	7363	0.338961	0.0133688	0.837338
ILMN_1727051	16	16q22.1	DDX19A	DEAD-box helicase 19A	55308	0.338917	0.0111746	0.837338
ILMN_2307851	4	4q13.3	NPFFR2	neuropeptide FF receptor 2	10886	0.338556	0.0138132	0.837338
ILMN_1667753	2	2q31.3-q32.1	PPP1R1C	protein phosphatase 1 regulatory inhibitor subunit 1C	151242	0.337772	0.00888966	0.837338
ILMN_1732154	1	1q23.1	BCAN	brevican	63827	0.337474	0.0144756	0.837338
ILMN_2053650	1	1q41	AURKAP1	aurora kinase A pseudogene 1	6791	0.337082	0.036662	0.90179
ILMN_2274420	9	9q22.31	SPTLC1	serine palmitoyltransferase long chain base subunit 1	10558	0.337031	0.00679629	0.837338
ILMN_1770548	3	3p22.3	CLASP2	cytoplasmic linker associated protein 2	23122	0.336485	0.0410575	0.910331
ILMN_1781906	10	10p15.1	RBM17	RNA binding motif protein 17	84991	0.336474	0.0159943	0.837338
ILMN_1679177	2	2q33.1	MARS2	methionyl-tRNA synthetase 2, mitochondrial	92935	0.336447	0.0154931	0.837338
ILMN_1772075	10	10q26.11	EMX2OS	EMX2 opposite strand/antisense RNA	196047	0.335359	0.0229696	0.881578
ILMN_1660292	1	1q21.2	MRPS21	mitochondrial ribosomal protein S21	54460	0.334223	0.00968445	0.837338
ILMN_1731745	12	12p13.33	NINJ2	ninjurin 2	4815	0.333769	0.0328157	0.895639
ILMN_1718925	14	14q32.13	SYNE3	spectrin repeat containing nuclear envelope family member 3	161176	0.33352	0.0347683	0.895639
ILMN_2341815	3	3q12.2	TFG	trafficking from ER to golgi regulator	10342	0.333514	0.0139828	0.837338
ILMN_3269123	11	11q13.4	DEFB131B	defensin beta 131B	100129216	0.333281	0.0231016	0.881578
ILMN_2352216	8	8q24.3	FBXL6	F-box and leucine rich repeat protein 6	26233	0.332874	0.0248641	0.883147
ILMN_1746579	17	17q25.1	UBE2O	ubiquitin conjugating enzyme E2 O	63893	0.33254	0.00632919	0.837338
ILMN_1807423	7	7p15.3	IGF2BP3	insulin like growth factor 2 mRNA binding protein 3	10643	0.332507	0.00864968	0.837338
ILMN_1802766	X	Xq25	DCAF12L1	DDB1 and CUL4 associated factor 12 like 1	139170	0.331378	0.0126435	0.837338
ILMN_1699022	11	11q21	ENDOD1	endonuclease domain containing 1	23052	0.330317	0.0397405	0.906174
ILMN_1710428	10	10q21.2	CDK1	cyclin dependent kinase 1	983	0.330148	0.0339706	0.895639
ILMN_1772540	16	16q23.2	ATMIN	ATM interactor	23300	0.3301	0.0386132	0.906174
ILMN_1687867	12	12q13.13	KRT8	keratin 8	3856	0.329516	0.0270745	0.883778
ILMN_1660275	2	2p24.1	LDAH	lipid droplet associated hydrolase	60526	0.329453	0.0254204	0.883147
ILMN_1747683	18	18q11.2	AQP4	aquaporin 4	361	0.329401	0.00548034	0.837338
ILMN_1677363	14	14q11.2	TMEM253	transmembrane protein 253	643382	0.329213	0.0137798	0.837338
ILMN_1685493	12	12q22	TMCC3	transmembrane and coiled-coil domain family 3	57458	0.329085	0.0423905	0.914758
ILMN_1758907	2	2q37.1	UGT1A6	UDP glucuronosyltransferase family 1 member A6	54578	0.328646	0.0260324	0.883778
ILMN_2315208	7	7p13	CAMK2B	calcium/calmodulin dependent protein kinase II beta	816	0.32864	0.00858677	0.837338
ILMN_1714252	17	17p13.1	SLC16A13	solute carrier family 16 member 13	201232	0.328418	0.0154092	0.837338
ILMN_1717745	10	10q26.11	TIAL1	TIA1 cytotoxic granule associated RNA binding protein like 1	7073	0.328413	0.0284143	0.883778
ILMN_1702413	8	8q13.1	PPP1R42	protein phosphatase 1 regulatory subunit 42	286187	0.328003	0.0355626	0.898287
ILMN_1740627	6	6q25.2-q25.3	TIAM2	TIAM Rac1 associated GEF 2	26230	0.327742	0.0346977	0.895639
ILMN_2412768	1	1p13.2	HIPK1	homeodomain interacting protein kinase 1	204851	0.327611	0.0474249	0.919151
ILMN_1711772	16	16q24.1	FLJ30679	uncharacterized protein FLJ30679	146512	0.327461	0.00732172	0.837338
ILMN_1656942	X	Xp11.23	PRICKLE3	prickle planar cell polarity protein 3	4007	0.326445	0.0469163	0.919151
ILMN_2221769	1	1p36.21	PRAMEF4	PRAME family member 4	400735	0.32546	0.0418212	0.911396
ILMN_2055523	8	8p21.3	CSGALNACT1	chondroitin sulfate N-acetylgalactosaminyltransferase 1	55790	0.325102	0.0117419	0.837338
ILMN_1764607	2	2q37.1	UGT1A7	UDP glucuronosyltransferase family 1 member A7	54577	0.324381	0.0153608	0.837338
ILMN_1798838	11	11q13.3	CTTN	cortactin	2017	0.324039	0.0279187	0.883778
ILMN_2098571	3	3q26.2	MYNN	myoneurin	55892	0.323868	0.0493903	0.920838
ILMN_1699610	17	17q12	CCT6B	chaperonin containing TCP1 subunit 6B	10693	0.323734	0.0341859	0.895639
ILMN_1683552	1	1p32.3	SSBP3	single stranded DNA binding protein 3	23648	0.323238	0.0413132	0.91088
ILMN_1740920	10	10q26.13	ACADSB	acyl-CoA dehydrogenase short/branched chain	36	0.322739	0.0477548	0.919151
ILMN_1677581	16	16q12.2	RPGRIP1L	RPGRIP1 like	23322	0.322292	0.049018	0.920838
ILMN_2191822	1	1p21.3	ALG14	ALG14 UDP-N-acetylglucosaminyltransferase subunit	199857	0.321768	0.0407881	0.91023
ILMN_3195401	15	15q21.2	GABPB1	GA binding protein transcription factor subunit beta 1	2553	0.321544	0.00991922	0.837338
ILMN_1728765	1	1q44	ZBTB18	zinc finger and BTB domain containing 18	10472	0.321373	0.0216112	0.881578
ILMN_3187530	X	Xq22.1	CENPI	centromere protein I	2491	0.321203	0.00507037	0.837338
ILMN_3310176	7	7q32.1	MIR593	microRNA 593	693178	0.321164	0.0480599	0.919151
ILMN_1740217	6	6q16.3	HACE1	HECT domain and ankyrin repeat containing E3 ubiquitin protein ligase 1	57531	0.320868	0.0449326	0.919151
ILMN_2309615	19	19q13.31	PSG6	pregnancy specific beta-1-glycoprotein 6	5675	0.32068	0.0129233	0.837338
ILMN_1807034	11	11p15.2	CALCA	calcitonin related polypeptide alpha	796	0.320384	0.01987	0.876422
ILMN_1722127	8	8q22.1	RAD54B	RAD54 homolog B	25788	0.320213	0.0117368	0.837338
ILMN_2272270	2	2q36.3	COL4A3	collagen type IV alpha 3 chain	1285	0.319936	0.00499997	0.837338
ILMN_1772658	5	5p15.32	ICE1	interactor of little elongation complex ELL subunit 1	23379	0.319923	0.0399924	0.906174
ILMN_1695299	4	4q35.1	PDLIM3	PDZ and LIM domain 3	27295	0.319413	0.025243	0.883147
ILMN_1707649	9	9p23	MPDZ	multiple PDZ domain crumbs cell polarity complex component	8777	0.319326	0.0418042	0.911396
ILMN_1782551	8	8q21.2	E2F5	E2F transcription factor 5	1875	0.319174	0.0347203	0.895639
ILMN_1662801	X	Xq13.1	ZMYM3	zinc finger MYM-type containing 3	9203	0.319061	0.0303421	0.886505
ILMN_1801842	3	3q25.32	PTX3	pentraxin 3	5806	0.318393	0.0254517	0.883147
ILMN_2062468	4	4q12	IGFBP7	insulin like growth factor binding protein 7	3490	0.317899	0.00944303	0.837338
ILMN_2342437	4	4p14	KLHL5	kelch like family member 5	51088	0.316672	0.0397965	0.906174
ILMN_1669281	16	16p12.1	CLN3	CLN3 lysosomal/endosomal transmembrane protein, battenin	1201	0.316582	0.0137737	0.837338
ILMN_1796335	16	16q12.2	LPCAT2	lysophosphatidylcholine acyltransferase 2	54947	0.315332	0.029858	0.884921
ILMN_1666364	12	12q13.3	COQ10A	coenzyme Q10A	93058	0.315317	0.0328704	0.895639
ILMN_2298366	4	4p14	TLR10	toll like receptor 10	81793	0.314486	0.0477626	0.919151
ILMN_1737396	2	2q24.2	PSMD14	proteasome 26S subunit, non-ATPase 14	10213	0.314343	0.0434614	0.919151
ILMN_2047354	1	1q32.3	LINC00467	long intergenic non-protein coding RNA 467	84791	0.314323	0.0489126	0.920838
ILMN_1803772	11	11q13.2	POLD4	DNA polymerase delta 4, accessory subunit	57804	0.31403	0.048239	0.919151
ILMN_2336803	X	Xp11.4	RPGR	retinitis pigmentosa GTPase regulator	6103	0.313559	0.0427471	0.916202
ILMN_1664630	11	11q24.2	CHEK1	checkpoint kinase 1	1111	0.313538	0.0267954	0.883778
ILMN_1761808	2	2p21	MCFD2	multiple coagulation factor deficiency 2, ER cargo receptor complex subunit	90411	0.313151	0.0473359	0.919151
ILMN_2306077	1	1p31.1	USP33	ubiquitin specific peptidase 33	23032	0.312828	0.0141499	0.837338
ILMN_2285603	19	19q13.32	DMPK	DM1 protein kinase	1760	0.312668	0.0234927	0.881578
ILMN_1657968	19	19p13.3	MAP2K2	mitogen-activated protein kinase kinase 2	5605	0.312483	0.0341644	0.895639
ILMN_2384785	19	19q12	CCNE1	cyclin E1	898	0.31164	0.040925	0.91023
ILMN_1722091	20	20q13.12	TP53TG5	TP53 target 5	27296	0.311074	0.0191736	0.873833
ILMN_1731891	8	8p12	UBXN8	UBX domain protein 8	7993	0.310579	0.0390995	0.906174
ILMN_2094061	18	18p11.21	IMPA2	inositol monophosphatase 2	3613	0.310228	0.0284262	0.883778
ILMN_1795178	9	9q33.2	OR5C1	olfactory receptor family 5 subfamily C member 1	392391	0.310102	0.0235251	0.881578
ILMN_1753868	18	18p11.21	POTEC	POTE ankyrin domain family member C	388468	0.310084	0.0354629	0.897431
ILMN_1753182	20	20q13.33	COL20A1	collagen type XX alpha 1 chain	57642	0.310025	0.0366331	0.90179
ILMN_1719010	17	17q21.31	ARL4D	ADP ribosylation factor like GTPase 4D	379	0.309617	0.0188588	0.869054
ILMN_2351906	19	19q13.33	ACP4	acid phosphatase 4	93650	0.309497	0.00563788	0.837338
ILMN_2383077	6	6p21.32	SLC39A7	solute carrier family 39 member 7	7922	0.309202	0.0493523	0.920838
ILMN_3241182	2	2q13	LINC01106	long intergenic non-protein coding RNA 1106	151009	0.309025	0.0174655	0.85282
ILMN_1676799	15	15q15.3	MFAP1	microfibril associated protein 1	4236	0.308361	0.0143157	0.837338
ILMN_1707763	7	7q31.2	ST7	suppression of tumorigenicity 7	7982	0.307696	0.0431995	0.918451
ILMN_1655137	1	1p32.3	TUT4	terminal uridylyl transferase 4	23318	0.307637	0.00675716	0.837338
ILMN_1770537	X	Xq22.2	BEX3	brain expressed X-linked 3	27018	0.307447	0.0422114	0.914758
ILMN_1661717	13	13q34	TFDP1	transcription factor Dp-1	7027	0.307371	0.0173142	0.850965
ILMN_2219466	22	22q13.1	APOBEC3B	apolipoprotein B mRNA editing enzyme catalytic subunit 3B	9582	0.307357	0.0443093	0.919151
ILMN_1715760	17	17q11.2	LGALS9	galectin 9	3965	0.307325	0.0463883	0.919151
ILMN_1767679	22	22q13.2	MCAT	malonyl-CoA-acyl carrier protein transacylase	27349	0.307291	0.0435345	0.919151
ILMN_1745570	19	19q13.41	KLK7	kallikrein related peptidase 7	5650	0.307083	0.0241202	0.883147
ILMN_1739641	22	22q12.2	MTMR3	myotubularin related protein 3	8897	0.306494	0.00714498	0.837338
ILMN_3240173	16	16q22.1	MTSS2	MTSS I-BAR domain containing 2	92154	0.306441	0.0397082	0.906174
ILMN_1694776	1	1p32.3	SCP2	sterol carrier protein 2	6342	0.306405	0.0212683	0.881578
ILMN_1810759	2	2q23.2	MMADHC	metabolism of cobalamin associated D	27249	0.306239	0.00552853	0.837338
ILMN_1742699	6	6p21.31	HMGA1	high mobility group AT-hook 1	3159	0.305776	0.0247255	0.883147
ILMN_1791531	16	16q23.1	FA2H	fatty acid 2-hydroxylase	79152	0.305342	0.0192714	0.873833
ILMN_2404512	1	1q42.13	PSEN2	presenilin 2	5664	0.305165	0.0176244	0.8534
ILMN_3307738	15	15q25.2	FSD2	fibronectin type III and SPRY domain containing 2	123722	0.305092	0.0305375	0.886772
ILMN_1739967	12	12q14.2	TBK1	TANK binding kinase 1	29110	0.305089	0.0249267	0.883147
ILMN_1801521	16	16p13.11	ABCC6	ATP binding cassette subfamily C member 6	368	0.304307	0.0256044	0.883778
ILMN_1691334	7	7p14.1	NME8	NME/NM23 family member 8	51314	0.3039	0.049165	0.920838
ILMN_1680580	1	1q32.1	ACTG1P25	actin gamma 1 pseudogene 25	148709	0.302944	0.0423768	0.914758
ILMN_3245650	15	15q22.31	IGDCC3	immunoglobulin superfamily DCC subclass member 3	9543	0.301445	0.0465026	0.919151
ILMN_1814230	X	Xq28	CMC4	C-X9-C motif containing 4	100272147	0.300879	0.039688	0.906174
ILMN_1715188	15	15q21.2	USP8	ubiquitin specific peptidase 8	9101	0.300647	0.0368291	0.90179
ILMN_1724495	2	2q31.2	SESTD1	SEC14 and spectrin domain containing 1	91404	0.29996	0.0192847	0.873833
ILMN_1735439	X	Xp21.2	FTHL17	ferritin heavy chain like 17	53940	0.298784	0.00903813	0.837338
ILMN_2299072	17	17q21.33	LUC7L3	LUC7 like 3 pre-mRNA splicing factor	51747	0.298496	0.0228603	0.881578
ILMN_1676222	16	16p13.3	C16orf89	chromosome 16 open reading frame 89	146556	0.298218	0.0101532	0.837338
ILMN_2099045	3	3q13.13	CIP2A	cellular inhibitor of PP2A	57650	0.298024	0.0341423	0.895639
ILMN_1746837	7	7p12.3	UPP1	uridine phosphorylase 1	7378	0.297901	0.0459116	0.919151
ILMN_1672811	1	1p36.33	C1orf159	chromosome 1 open reading frame 159	54991	0.297763	0.0361605	0.901424
ILMN_1691393	2	2q35	DNPEP	aspartyl aminopeptidase	23549	0.297694	0.0479166	0.919151
ILMN_1688464	3	3q27.1	MAP6D1	MAP6 domain containing 1	79929	0.297588	0.0269629	0.883778
ILMN_1730964	16	16q22.1	CLEC18C	C-type lectin domain family 18 member C	283971	0.297499	0.0334157	0.895639
ILMN_3240092	11	11q21	MED17	mediator complex subunit 17	9440	0.29739	0.0232263	0.881578
ILMN_1728870	X	Xp11.4	DDX3X	DEAD-box helicase 3 X-linked	1654	0.297153	0.0441941	0.919151
ILMN_2395451	9	9q34.11	ASS1	argininosuccinate synthase 1	445	0.296857	0.0105343	0.837338
ILMN_1726505	12	12q23.1	GOLGA2P5	GOLGA2 pseudogene 5	55592	0.296794	0.0279249	0.883778
ILMN_3231654	17	17q11.2	NF1	neurofibromin 1	4763	0.296399	0.00280089	0.820678
ILMN_2330845	17	17q21.31	NSF	N-ethylmaleimide sensitive factor, vesicle fusing ATPase	4905	0.296225	0.035632	0.898287
ILMN_1676173	22	22q13.31	PARVB	parvin beta	29780	0.296206	0.0290138	0.883778
ILMN_1749014	17	17q21.2	ACLY	ATP citrate lyase	47	0.295885	0.0292946	0.883778
ILMN_1697802	1	1p36.22	SLC25A33	solute carrier family 25 member 33	84275	0.295716	0.0102334	0.837338
ILMN_1690122	22	22q11.21	CRKL	CRK like proto-oncogene, adaptor protein	1399	0.295412	0.0447788	0.919151
ILMN_1758717	17	17q11.2	SUPT6H	SPT6 homolog, histone chaperone and transcription elongation factor	6830	0.295228	0.0489918	0.920838
ILMN_2397406	X	Xp22.2	AMELX	amelogenin X-linked	265	0.295109	0.0116487	0.837338
ILMN_2335302	16	16p13.11	ABCC1	ATP binding cassette subfamily C member 1	4363	0.294891	0.0227077	0.881578
ILMN_1711283	5	5q31.3	PCDHGA9	protocadherin gamma subfamily A, 9	56107	0.294733	0.0231977	0.881578
ILMN_1692664	22	22q13.31	PRR5	proline rich 5	55615	0.294537	0.0339968	0.895639
ILMN_1789449	21	21q22.3	PKNOX1	PBX/knotted 1 homeobox 1	5316	0.29415	0.0496386	0.920838
ILMN_3247671	3	3q27.1	SNORD66	small nucleolar RNA, C/D box 66	692107	0.293791	0.0148786	0.837338
ILMN_2388585	6	6q22.1	GOPC	golgi associated PDZ and coiled-coil motif containing	57120	0.293474	0.0122795	0.837338
ILMN_1669102	12	12q13.13	ATP5MC2	ATP synthase membrane subunit c locus 2	517	0.293335	0.0324449	0.895639
ILMN_1807554	8	8q13.3	EYA1	EYA transcriptional coactivator and phosphatase 1	2138	0.293266	0.0317128	0.894622
ILMN_1667564	17	17p11.2	ALDH3A2	aldehyde dehydrogenase 3 family member A2	224	0.293111	0.0482821	0.919151
ILMN_1810069	2	2q33.3	CCNYL1	cyclin Y like 1	151195	0.292813	0.0385233	0.906174
ILMN_2375992	15	15q15.1	SPINT1	serine peptidase inhibitor, Kunitz type 1	6692	0.292461	0.00868679	0.837338
ILMN_1658299	3	3p21.31	CCR2	C-C motif chemokine receptor 2	729230	0.291429	0.0493956	0.920838
ILMN_3249351	X	Xq23	SNORA35	small nucleolar RNA, H/ACA box 35	677816	0.290948	0.038094	0.906174
ILMN_1791792	12	12p13.32	TIGAR	TP53 induced glycolysis regulatory phosphatase	57103	0.290459	0.0280462	0.883778
ILMN_1681882	16	16q13	CETP	cholesteryl ester transfer protein	1071	0.289544	0.0356959	0.898287
ILMN_1741455	12	12q24.11	USP30	ubiquitin specific peptidase 30	84749	0.289385	0.0153867	0.837338
ILMN_3246590	16	16q22.1	EXOC3L1	exocyst complex component 3 like 1	283849	0.28853	0.022264	0.881578
ILMN_1771949	18	18q11.2	TAF4B	TATA-box binding protein associated factor 4b	6875	0.287959	0.0469064	0.919151
ILMN_1668179	10	10q11.21	HNRNPF	heterogeneous nuclear ribonucleoprotein F	3185	0.287751	0.0233647	0.881578
ILMN_1690307	2	2p13.1	TPRKB	TP53RK binding protein	51002	0.287008	0.0368828	0.901822
ILMN_2123119	4	4q28.2	MFSD8	major facilitator superfamily domain containing 8	256471	0.286863	0.0430932	0.918221
ILMN_1814823	19	19q13.33	FTL	ferritin light chain	2512	0.286786	0.0135467	0.837338
ILMN_1664859	12	12p12.1	ST8SIA1	ST8 alpha-N-acetyl-neuraminide alpha-2,8-sialyltransferase 1	6489	0.286352	0.0156248	0.837338
ILMN_1896149	1	1p36.23	ENO1-AS1	ENO1 antisense RNA 1	100505975	0.286003	0.0453578	0.919151
ILMN_1769027	1	1q21.3	CDC42SE1	CDC42 small effector 1	56882	0.285181	0.046059	0.919151
ILMN_2092756	11	11q12.2	TMEM109	transmembrane protein 109	79073	0.285046	0.0425636	0.915995
ILMN_3234959	4	4p16.3	LINC00955	long intergenic non-protein coding RNA 955	285492	0.283473	0.0165619	0.839918
ILMN_1673207	2	2p25.1	KLF11	Kruppel like factor 11	8462	0.283034	0.0463867	0.919151
ILMN_1717165	X	Xq13.1	IGBP1	immunoglobulin binding protein 1	3476	0.28261	0.0124455	0.837338
ILMN_2390114	19	19p13.3	AP3D1	adaptor related protein complex 3 subunit delta 1	8943	0.281761	0.043709	0.919151
ILMN_1678437	13	13q13.1	FRY	FRY microtubule binding protein	10129	0.281515	0.01016	0.837338
ILMN_2351638	X	Xq22.1	BEX4	brain expressed X-linked 4	56271	0.280842	0.0400948	0.906174
ILMN_1672496	9	9p21.1	DNAJA1	DnaJ heat shock protein family (Hsp40) member A1	3301	0.280551	0.00412537	0.837338
ILMN_1707326	20	20p12.1	TASP1	taspase 1	55617	0.280549	0.0262306	0.883778
ILMN_1815707	15	15q23	CALML4	calmodulin like 4	91860	0.280416	0.0181055	0.855075
ILMN_2097858	14	14q24.3	CIPC	CLOCK interacting pacemaker	85457	0.279933	0.0213627	0.881578
ILMN_1749629	7	7q36.1	CUL1	cullin 1	8454	0.279916	0.0116849	0.837338
ILMN_3243238	16	16p13.3	TPSB2	tryptase beta 2	64499	0.279812	0.0152848	0.837338
ILMN_2203544	7	7q35	OR2A9P	olfactory receptor family 2 subfamily A member 9 pseudogene	441295	0.279568	0.0044552	0.837338
ILMN_1677968	9	9q34.3	PPP1R26	protein phosphatase 1 regulatory subunit 26	9858	0.279499	0.0202887	0.878608
ILMN_1653026	4	4q21.22	PLAC8	placenta associated 8	51316	0.279225	0.0200651	0.878534
ILMN_2181748	3	3q25.31	PA2G4P4	proliferation-associated 2G4 pseudogene 4	647033	0.278975	0.02077	0.878608
ILMN_1757294	3	3p21.31	PRSS42P	serine protease 42, pseudogene	339906	0.278875	0.0198794	0.876422
ILMN_2294644	1	1q25.1-q25.2	COP1	COP1 E3 ubiquitin ligase	64326	0.278523	0.0337667	0.895639
ILMN_2222695	19	19p13.2	ZNF491	zinc finger protein 491	126069	0.278229	0.0317922	0.894622
ILMN_1656386	4	4q26	SEC24D	SEC24 homolog D, COPII coat complex component	9871	0.27818	0.0414576	0.91088
ILMN_1791949	6	6p22.1	PGBD1	piggyBac transposable element derived 1	84547	0.277616	0.0249064	0.883147
ILMN_2378376	17	17q23.3	CYB561	cytochrome b561	1534	0.277421	0.0301618	0.885389
ILMN_1813776	11	11q12.1	OR4D6	olfactory receptor family 4 subfamily D member 6	219983	0.277273	0.0200863	0.878534
ILMN_1674402	8	8q24.22	TMEM71	transmembrane protein 71	137835	0.276857	0.0322486	0.895639
ILMN_2212999	2	2q23.1-q23.2	KIF5C	kinesin family member 5C	3800	0.275848	0.0349873	0.897431
ILMN_2383058	20	20p13	SIRPG	signal regulatory protein gamma	55423	0.275824	0.00688002	0.837338
ILMN_3176790	8	8q12.1	UBXN2B	UBX domain protein 2B	137886	0.275778	0.0380301	0.906174
ILMN_1759488	1	1q41	DUSP10	dual specificity phosphatase 10	11221	0.275153	0.0178689	0.854532
ILMN_1735792	17	17q25.1	RHBDF2	rhomboid 5 homolog 2	79651	0.274906	0.0360229	0.901424
ILMN_2253065	12	12p12.3	H2AJ	H2A.J histone	55766	0.274751	0.00763589	0.837338
ILMN_1793033	7	7q32.1	RBM28	RNA binding motif protein 28	55131	0.274086	0.0481096	0.919151
ILMN_1746708	5	5q31.3	PCDHGB3	protocadherin gamma subfamily B, 3	56102	0.273305	0.0442028	0.919151
ILMN_3292042	1	1q24.2	LINC01142	long intergenic non-protein coding RNA 1142	284688	0.273162	0.0218841	0.881578
ILMN_1778144	12	12q13.11	SLC48A1	solute carrier family 48 member 1	55652	0.273143	0.0395865	0.906174
ILMN_1713752	20	20q13.12	SERINC3	serine incorporator 3	10955	0.27311	0.0388092	0.906174
ILMN_1779828	3	3p26.1	EDEM1	ER degradation enhancing alpha-mannosidase like protein 1	9695	0.272804	0.0214407	0.881578
ILMN_3300604	10	10q11.21	ZNF37BP	zinc finger protein 37B, pseudogene	100129482	0.272102	0.0163369	0.837338
ILMN_1683263	12	12q21.1	TSPAN8	tetraspanin 8	7103	0.271635	0.0207632	0.878608
ILMN_1768007	2	2q37.1	TEX44	testis expressed 44	165100	0.270981	0.0400772	0.906174
ILMN_2304659	17	17q21.33	CACNA1G	calcium voltage-gated channel subunit alpha1 G	8913	0.270918	0.0107249	0.837338
ILMN_1810486	17	17q11.2	RAB34	RAB34, member RAS oncogene family	83871	0.270766	0.0323673	0.895639
ILMN_1795906	10	10q22.1	PCBD1	pterin-4 alpha-carbinolamine dehydratase 1	5092	0.270739	0.0449916	0.919151
ILMN_1782635	12	12p11.21	YARS2	tyrosyl-tRNA synthetase 2	51067	0.270732	0.00824321	0.837338
ILMN_1672102	12	12q15	PTPRB	protein tyrosine phosphatase receptor type B	5787	0.269948	0.0485549	0.920617
ILMN_2204526	1	1p34.1	TCTEX1D4	Tctex1 domain containing 4	343521	0.269798	0.0134895	0.837338
ILMN_1812000	1	1p35.1	TRIM62	tripartite motif containing 62	55223	0.269794	0.0440464	0.919151
ILMN_1775111	7	7q32.1	SND1	staphylococcal nuclease and tudor domain containing 1	27044	0.269183	0.0174305	0.85282
ILMN_1724300	3	3q27.3	MASP1	mannan binding lectin serine peptidase 1	5648	0.268952	0.0091908	0.837338
ILMN_2329927	21	21q22.3	ABCG1	ATP binding cassette subfamily G member 1	9619	0.267178	0.0247095	0.883147
ILMN_1778220	8	8p23.1	FAM90A7P	putative protein FAM90A7	441317	0.266759	0.0411356	0.910849
ILMN_2071186	1	1p36.22	CORT	cortistatin	1325	0.266637	0.0285759	0.883778
ILMN_1791211	8	8p21.3	DOK2	docking protein 2	9046	0.266595	0.0358871	0.901125
ILMN_2319228	8	8q23.3	CSMD3	CUB and Sushi multiple domains 3	114788	0.265674	0.0248123	0.883147
ILMN_1796154	7	7q22.1	SLC26A5	solute carrier family 26 member 5	375611	0.264327	0.0277789	0.883778
ILMN_1699447	1	1q32.3	TRAF5	TNF receptor associated factor 5	7188	0.263828	0.0378333	0.906174
ILMN_2105308	20	20q13.13	DPM1	dolichyl-phosphate mannosyltransferase subunit 1, catalytic	8813	0.262612	0.0272417	0.883778
ILMN_1691641	X	Xq13.1	CITED1	Cbp/p300 interacting transactivator with Glu/Asp rich carboxy-terminal domain 1	4435	0.261971	0.0298822	0.884921
ILMN_1711269	4	4q34.2	ASB5	ankyrin repeat and SOCS box containing 5	140458	0.261783	0.0267939	0.883778
ILMN_2155228	17	17q11.2	CRLF3	cytokine receptor like factor 3	51379	0.261565	0.0342403	0.895639
ILMN_1749606	16	16q24.3	ZNF778	zinc finger protein 778	197320	0.26148	0.0468225	0.919151
ILMN_1734645	20	20q11.21	SUN5	Sad1 and UNC84 domain containing 5	140732	0.261196	0.0232488	0.881578
ILMN_1774733	16	16p13.13	SOCS1	suppressor of cytokine signaling 1	8651	0.261136	0.046087	0.919151
ILMN_1754048	3	3p22.1	KLHL40	kelch like family member 40	131377	0.260841	0.0101755	0.837338
ILMN_3251445	9	9q34.13	MED27	mediator complex subunit 27	9442	0.260498	0.0413943	0.91088
ILMN_2159203	11	11p15.5	KRTAP5-5	keratin associated protein 5-5	439915	0.260441	0.0341335	0.895639
ILMN_1798808	8	8q24.3	FOXH1	forkhead box H1	8928	0.259843	0.0489433	0.920838
ILMN_1691860	4	4q28.1	SPRY1	sprouty RTK signaling antagonist 1	10252	0.259405	0.0302743	0.886505
ILMN_1757143	11	11p11.2	DGKZ	diacylglycerol kinase zeta	8525	0.259323	0.0451555	0.919151
ILMN_2387553	14	14q23.1	PSMA3	proteasome 20S subunit alpha 3	5684	0.258705	0.0135083	0.837338
ILMN_1655429	17	17q11.2	TNFAIP1	TNF alpha induced protein 1	7126	0.25868	0.0301088	0.884938
ILMN_1726437	17	17q23.2	EFCAB3	EF-hand calcium binding domain 3	146779	0.258293	0.0158487	0.837338
ILMN_1725791	10	10p12.33	HACD1	3-hydroxyacyl-CoA dehydratase 1	9200	0.257988	0.0277151	0.883778
ILMN_1676335	19	19p13.3	CSNK1G2	casein kinase 1 gamma 2	1455	0.257975	0.0128384	0.837338
ILMN_1656576	19	19p13.3	ATCAY	ATCAY kinesin light chain interacting caytaxin	85300	0.257664	0.0446292	0.919151
ILMN_1691127	17	17q11.2	VTN	vitronectin	7448	0.257358	0.0114338	0.837338
ILMN_1757130	1	1q43-q44	AKT3	AKT serine/threonine kinase 3	10000	0.257179	0.0421079	0.914758
ILMN_1737635	5	5p13.2	RAD1	RAD1 checkpoint DNA exonuclease	5810	0.256973	0.0250739	0.883147
ILMN_1738223	6	6q27	LINC00574	long intergenic non-protein coding RNA 574	80069	0.256768	0.0214315	0.881578
ILMN_1737036	20	20q11.22	GGT7	gamma-glutamyltransferase 7	2686	0.256279	0.0299391	0.884938
ILMN_3246544	6	6q25.3	OSTCP1	oligosaccharyltransferase complex subunit pseudogene 1	202459	0.255927	0.0242331	0.883147
ILMN_3309394	14	14q32.31	MIR494	microRNA 494	574452	0.255753	0.0132856	0.837338
ILMN_1768816	12	12q23.1	TMPO	thymopoietin	7112	0.255531	0.0491107	0.920838
ILMN_1675428	5	5q31.3	PCDHGC3	protocadherin gamma subfamily C, 3	5098	0.255427	0.0423998	0.914758
ILMN_3239284	17	17p11.2	B9D1	B9 domain containing 1	27077	0.2553	0.027723	0.883778
ILMN_3233763	16	16q24.2	SNAI3-AS1	SNAI3 antisense RNA 1	197187	0.254519	0.0480164	0.919151
ILMN_1737252	8	8p12	NRG1	neuregulin 1	3084	0.25421	0.0453023	0.919151
ILMN_1658310	3	3q29	PCYT1A	phosphate cytidylyltransferase 1, choline, alpha	5130	0.254086	0.0451394	0.919151
ILMN_1729613	X	Xq23	TDGF1P3	teratocarcinoma-derived growth factor 1 pseudogene 3	6998	0.253506	0.0169539	0.848184
ILMN_1813021	X	Xq22.3	COL4A6	collagen type IV alpha 6 chain	1288	0.252921	0.0237031	0.883147
ILMN_3239950	6	6q13	KHDC1L	KH domain containing 1 like	100129128	0.252877	0.0279262	0.883778
ILMN_1789639	1	1q32.1	FMOD	fibromodulin	2331	0.25273	0.0298255	0.884921
ILMN_1698072	10	10p15.2	PITRM1	pitrilysin metallopeptidase 1	10531	0.252726	0.0394842	0.906174
ILMN_1721876	17	17q25.3	TIMP2	TIMP metallopeptidase inhibitor 2	7077	0.251813	0.0175803	0.85282
ILMN_1778338	X	Xq22.3	RNF128	ring finger protein 128	79589	0.251218	0.0250209	0.883147
ILMN_1658660	15	15q14	ACTC1	actin alpha cardiac muscle 1	70	0.251072	0.0404835	0.909257
ILMN_1759915	7	7q22.1	ARPC1A	actin related protein 2/3 complex subunit 1A	10552	0.250464	0.0346483	0.895639
ILMN_1713686	16	16q22.1	IL34	interleukin 34	146433	0.25038	0.0287347	0.883778
ILMN_2377056	4	4q27	BBS7	Bardet-Biedl syndrome 7	55212	0.250359	0.0444187	0.919151
ILMN_1825660	11	11q24.2	CCDC15	coiled-coil domain containing 15	80071	0.250303	0.0240261	0.883147
ILMN_1703142	19	19p13.2	MARCHF2	membrane associated ring-CH-type finger 2	51257	0.250238	0.0239802	0.883147
ILMN_1784176	17	17q24.3	ABCA5	ATP binding cassette subfamily A member 5	23461	0.24993	0.0228092	0.881578
ILMN_1802106	22	22q13.1	APOBEC3G	apolipoprotein B mRNA editing enzyme catalytic subunit 3G	60489	0.248379	0.0410594	0.910331
ILMN_1809818	1	1q23.1	PRCC	proline rich mitotic checkpoint control factor	5546	0.247684	0.0297878	0.884921
ILMN_1795499	4	4q31.1	MAML3	mastermind like transcriptional coactivator 3	55534	0.24739	0.0407771	0.91023
ILMN_1752665	16	16q22.1	ELMO3	engulfment and cell motility 3	79767	0.246752	0.0478897	0.919151
ILMN_3247170	6	6p22.1	SNORD32B	small nucleolar RNA, C/D box 32B	692092	0.246682	0.0416535	0.911396
ILMN_1676005	3	3q21.1	KPNA1	karyopherin subunit alpha 1	3836	0.246439	0.0122823	0.837338
ILMN_1694778	12	12q13.13	KRT18	keratin 18	3875	0.245311	0.0189391	0.869433
ILMN_2333708	X	Xq25	STAG2	stromal antigen 2	10735	0.245011	0.0327468	0.895639
ILMN_1745148	20	20q13.13	ZNFX1	zinc finger NFX1-type containing 1	57169	0.244687	0.0367688	0.90179
ILMN_1745076	5	5q33.3	CLINT1	clathrin interactor 1	9685	0.244601	0.0485986	0.920617
ILMN_1653678	11	11q12.1	DTX4	deltex E3 ubiquitin ligase 4	23220	0.24453	0.0281388	0.883778
ILMN_2354381	7	7q21.3	PON2	paraoxonase 2	5445	0.244112	0.0422407	0.914758
ILMN_1667519	11	11p15.2	RRAS2	RAS related 2	22800	0.243387	0.0325307	0.895639
ILMN_1687199	17	17p11.2	FBXW10	F-box and WD repeat domain containing 10	10517	0.242848	0.0274043	0.883778
ILMN_1805564	2	2q32.1	PDE1A	phosphodiesterase 1A	5136	0.242796	0.00994723	0.837338
ILMN_1700232	6	6q24.3	FBXO30	F-box protein 30	84085	0.241025	0.0283371	0.883778
ILMN_1743847	1	1p36.33	ACAP3	ArfGAP with coiled-coil, ankyrin repeat and PH domains 3	116983	0.240947	0.0102983	0.837338
ILMN_1806395	9	9q34.3	LHX3	LIM homeobox 3	8022	0.240154	0.024632	0.883147
ILMN_2341006	22	22q11.21	SCARF2	scavenger receptor class F member 2	91179	0.239516	0.0432555	0.91884
ILMN_1653310	19	19q13.42	ZNF580	zinc finger protein 580	51157	0.239172	0.0317857	0.894622
ILMN_1798657	3	3q26.32	TBL1XR1	TBL1X receptor 1	79718	0.238148	0.0401309	0.906174
ILMN_1716309	X	Xp22.2	EGFL6	EGF like domain multiple 6	25975	0.237104	0.0394581	0.906174
ILMN_3177285	1	1p36.12	HNRNPR	heterogeneous nuclear ribonucleoprotein R	10236	0.236931	0.0439624	0.919151
ILMN_1807439	15	15q26.3	ALDH1A3	aldehyde dehydrogenase 1 family member A3	220	0.236908	0.0303154	0.886505
ILMN_1719848	17	17p13.3	OR3A2	olfactory receptor family 3 subfamily A member 2	4995	0.23688	0.0296744	0.884921
ILMN_3243686	21	21q21.3	LTN1	listerin E3 ubiquitin protein ligase 1	26046	0.236804	0.0467598	0.919151
ILMN_1686261	17	17p11.2	TOM1L2	target of myb1 like 2 membrane trafficking protein	146691	0.236426	0.0335437	0.895639
ILMN_1774836	7	7q22.1	PLOD3	procollagen-lysine,2-oxoglutarate 5-dioxygenase 3	8985	0.236021	0.0454283	0.919151
ILMN_1701940	9	9q34.11	MIGA2	mitoguardin 2	84895	0.23537	0.037545	0.906174
ILMN_3308300	X	Xq21.33	MIR548M	microRNA 548m	100313772	0.234738	0.041402	0.91088
ILMN_1664581	7	7p22.3	MICALL2	MICAL like 2	79778	0.233338	0.0280866	0.883778
ILMN_1754839	4	4p15.2	DHX15	DEAH-box helicase 15	1665	0.233293	0.043091	0.918221
ILMN_1692568	10	10q26.3	CFAP46	cilia and flagella associated protein 46	54777	0.233185	0.0388741	0.906174
ILMN_1743950	19	19q13.32	IGFL1	IGF like family member 1	374918	0.23306	0.0400453	0.906174
ILMN_2159339	8	8p11.21	NKX6-3	NK6 homeobox 3	157848	0.232644	0.0354354	0.897431
ILMN_2205588	5	5q31.3	PCDHB6	protocadherin beta 6	56130	0.232614	0.0388719	0.906174
ILMN_2162358	16	16p13.3	ZNF597	zinc finger protein 597	146434	0.232137	0.0304823	0.886772
ILMN_1725678	10	10q25.3	GFRA1	GDNF family receptor alpha 1	2674	0.231515	0.0389655	0.906174
ILMN_1716006	18	18q21.2	C18orf54	chromosome 18 open reading frame 54	162681	0.229844	0.0423571	0.914758
ILMN_1808956	15	15q24.2	TMEM266	transmembrane protein 266	123591	0.228497	0.0249419	0.883147
ILMN_1685413	11	11q14.1	ALG8	ALG8 alpha-1,3-glucosyltransferase	79053	0.227368	0.0444247	0.919151
ILMN_1761961	6	6p23	MCUR1	mitochondrial calcium uniporter regulator 1	63933	0.226848	0.0458544	0.919151
ILMN_2386100	10	10q26.13	BUB3	BUB3 mitotic checkpoint protein	9184	0.225948	0.046242	0.919151
ILMN_1792002	1	1q25.2	PAPPA2	pappalysin 2	60676	0.22497	0.0303056	0.886505
ILMN_1708152	22	22q12.3	BPIFC	BPI fold containing family C	254240	0.224653	0.0453112	0.919151
ILMN_1764986	1	1q42.13	H2BU1	H2B.U histone 1	128312	0.224485	0.044941	0.919151
ILMN_1716154	5	5q33.2	FAXDC2	fatty acid hydroxylase domain containing 2	10826	0.224061	0.0318837	0.894622
ILMN_1729225	4	4p16.1	SORCS2	sortilin related VPS10 domain containing receptor 2	57537	0.223309	0.0485721	0.920617
ILMN_1693274	19	19p13.11	USHBP1	USH1 protein network component harmonin binding protein 1	83878	0.222156	0.0288563	0.883778
ILMN_1702265	18	18q21.1	HDHD2	haloacid dehalogenase like hydrolase domain containing 2	84064	0.221237	0.0375262	0.906174
ILMN_3249050	Y	Yp11.2	TTTY1B	testis-specific transcript, Y-linked 1B	100101116	0.220144	0.0471232	0.919151
ILMN_2138530	3	3q23	ATR	ATR serine/threonine kinase	545	0.219999	0.0386924	0.906174
ILMN_1810045	17	17p13.2	NLRP1	NLR family pyrin domain containing 1	22861	0.219414	0.0324887	0.895639
ILMN_1778188	1	1p36.32	TP73	tumor protein p73	7161	0.218488	0.0301755	0.885389
ILMN_1678049	4	4q31.3	FGB	fibrinogen beta chain	2244	0.218068	0.0462296	0.919151
ILMN_2354334	16	16p11.2	ATXN2L	ataxin 2 like	11273	0.217832	0.0427755	0.916202
ILMN_2245814	10	10q21.3	RUFY2	RUN and FYVE domain containing 2	55680	0.217545	0.0436039	0.919151
ILMN_1805910	5	5q11.2	MIER3	MIER family member 3	166968	0.217171	0.0317855	0.894622
ILMN_1800897	1	1p32.3	NRDC	nardilysin convertase	4898	0.2171	0.039854	0.906174
ILMN_2113102	7	7p11.2	PHKG1	phosphorylase kinase catalytic subunit gamma 1	5260	0.215962	0.0450644	0.919151
ILMN_1736575	19	19q13.43	TRIM28	tripartite motif containing 28	10155	0.215188	0.0471089	0.919151
ILMN_2094351	10	10q23.32	NUDT9P1	nudix hydrolase 9 pseudogene 1	119369	0.215158	0.0300863	0.884938
ILMN_1759635	6	6q27	CCR6	C-C motif chemokine receptor 6	1235	0.214333	0.0196988	0.875175
ILMN_1674645	2	2q11.2	TSGA10	testis specific 10	80705	0.21399	0.0444945	0.919151
ILMN_1761016	5	5q14.1	SPZ1	spermatogenic leucine zipper 1	84654	0.213926	0.0382213	0.906174
ILMN_3280667	7	7q11.21	INTS4P2	integrator complex subunit 4 pseudogene 2	644619	0.213312	0.0279539	0.883778
ILMN_1698148	1	1p36.31	CHD5	chromodomain helicase DNA binding protein 5	26038	0.212165	0.0443497	0.919151
ILMN_1661138	1	1q22	GON4L	gon-4 like	54856	0.209855	0.0438535	0.919151
ILMN_1795243	X	Xq13.1	RPS4X	ribosomal protein S4 X-linked	6191	0.206836	0.0451705	0.919151
ILMN_1669390	19	19q13.32	PPP1R13L	protein phosphatase 1 regulatory subunit 13 like	10848	0.206139	0.0453914	0.919151
ILMN_1814808	16	16p13.12	BFAR	bifunctional apoptosis regulator	51283	0.197298	0.0496578	0.920838
ILMN_1767219	6	6p21.1	POLR1C	RNA polymerase I and III subunit C	9533	0.195512	0.0497574	0.920838
ILMN_1733341	22	22q13.1	FAM227A	family with sequence similarity 227 member A	646851	0.191711	0.0334411	0.895639
ILMN_1748765	17	17q11.2	NOS2	nitric oxide synthase 2	4843	0.191284	0.0483254	0.919151
ILMN_1785297	7	7q34	RAB19	RAB19, member RAS oncogene family	401409	0.188315	0.0361298	0.901424
ILMN_2382245	19	19q13.12	KIRREL2	kirre like nephrin family adhesion molecule 2	84063	0.183318	0.036735	0.90179
ILMN_1731621	5	5p13.2	RXFP3	relaxin family peptide receptor 3	51289	-0.179446	0.0496371	0.920838
ILMN_1790896	17	17p13.3	LOC284009	uncharacterized LOC284009	284009	-0.184337	0.0424	0.914758
ILMN_1737084	1	1p35.2	TXLNA	taxilin alpha	200081	-0.186432	0.0400338	0.906174
ILMN_1811098	X	Xp22.11	CBLL2	Cbl proto-oncogene like 2	158506	-0.187636	0.0424818	0.91595
ILMN_1654496	3	3q26.1-q26.2	LRRC77P	leucine rich repeat containing 77, pseudogene	646168	-0.189648	0.0473086	0.919151
ILMN_1795170	X	Xq27.3	SLITRK2	SLIT and NTRK like family member 2	84631	-0.190188	0.0446744	0.919151
ILMN_1683909	5	5q31.1	TRPC7	transient receptor potential cation channel subfamily C member 7	57113	-0.194242	0.0315613	0.894622
ILMN_2381397	2	2q33.1	HSPD1	heat shock protein family D (Hsp60) member 1	3329	-0.195811	0.0474836	0.919151
ILMN_1704870	19	19q13.32	PGLYRP1	peptidoglycan recognition protein 1	8993	-0.197448	0.0379833	0.906174
ILMN_1790759	7	7p12.3	SEPTIN7P2	septin 7 pseudogene 2	641977	-0.200319	0.0344921	0.895639
ILMN_1670901	17	17p12	COX10	cytochrome c oxidase assembly factor heme A:farnesyltransferase COX10	1352	-0.200803	0.0447809	0.919151
ILMN_3244666	8	8p23.1	LINC00965	long intergenic non-protein coding RNA 965	349196	-0.202546	0.0371459	0.904409
ILMN_1802019	4	4q32.1	GASK1B	golgi associated kinase 1B	51313	-0.203378	0.0409842	0.910331
ILMN_3310940	21	21q22.11	KRTAP21-3	keratin associated protein 21-3	100288323	-0.203989	0.032682	0.895639
ILMN_1687439	16	16q12.1	SNX20	sorting nexin 20	124460	-0.204577	0.0471077	0.919151
ILMN_1812302	2	2p22.2	RMDN2	regulator of microtubule dynamics 2	151393	-0.207855	0.0338002	0.895639
ILMN_1749109	10	10q22.1	PSAP	prosaposin	5660	-0.208854	0.0475233	0.919151
ILMN_1712035	3	3p21.31	TMEM115	transmembrane protein 115	11070	-0.209359	0.0376922	0.906174
ILMN_2394613	2	2p14	C1D	C1D nuclear receptor corepressor	10438	-0.209853	0.029073	0.883778
ILMN_2393067	19	19p13.2	ICAM4	intercellular adhesion molecule 4 (Landsteiner-Wiener blood group)	3386	-0.212225	0.0350027	0.897431
ILMN_1764216	11	11q12.1	OR5F1	olfactory receptor family 5 subfamily F member 1	338674	-0.212241	0.0368065	0.90179
ILMN_1808059	20	20q13.13	BCAS4	breast carcinoma amplified sequence 4	55653	-0.213648	0.0482913	0.919151
ILMN_1779404	8	8q24.3	PUF60	poly(U) binding splicing factor 60	22827	-0.214477	0.0486772	0.920838
ILMN_1680367	10	10q26.2	C10orf90	chromosome 10 open reading frame 90	118611	-0.214753	0.0372378	0.905366
ILMN_2283726	14	14q31.3	SPATA7	spermatogenesis associated 7	55812	-0.215099	0.0354421	0.897431
ILMN_1684530	5	5q11.2	SNX18	sorting nexin 18	112574	-0.216247	0.0428607	0.916666
ILMN_3310648	15	15q26.1	MIR7-2	microRNA 7-2	407044	-0.216387	0.0433898	0.919151
ILMN_1654545	8	8q24.3	CPSF1	cleavage and polyadenylation specific factor 1	29894	-0.216784	0.0383293	0.906174
ILMN_3256375	21	21q22.3	AATBC	apoptosis associated transcript in bladder cancer	284837	-0.217016	0.0459519	0.919151
ILMN_3244204	4	4q24	SLC9B1	solute carrier family 9 member B1	150159	-0.217475	0.0234375	0.881578
ILMN_1758323	3	3q22.1	ACP3	acid phosphatase 3	55	-0.219213	0.0288353	0.883778
ILMN_1777040	15	15q11.2	GOLGA8IP	golgin A8 family member I, pseudogene	283796	-0.220632	0.0272374	0.883778
ILMN_1670308	X	Xp22.2	GPM6B	glycoprotein M6B	2824	-0.220886	0.0303187	0.886505
ILMN_3309234	19	19p13.12	MIR181D	microRNA 181d	574457	-0.221146	0.0481238	0.919151
ILMN_1699071	21	21q21.3	MAP3K7CL	MAP3K7 C-terminal like	56911	-0.221505	0.0359572	0.901424
ILMN_1665323	17	17q11.2	RSKR	ribosomal protein S6 kinase related	124923	-0.223798	0.0493363	0.920838
ILMN_1667388	9	9q31.1	OR13C8	olfactory receptor family 13 subfamily C member 8	138802	-0.224016	0.0367149	0.90179
ILMN_2399694	16	16p12.3	NOMO2	NODAL modulator 2	283820	-0.224416	0.0417592	0.911396
ILMN_1699113	X	Xq27.1	LINC00632	long intergenic non-protein coding RNA 632	286411	-0.22476	0.0485271	0.920617
ILMN_2285032	5	5q34	TENM2	teneurin transmembrane protein 2	57451	-0.224882	0.0227761	0.881578
ILMN_2320336	15	15q24.1	CLK3	CDC like kinase 3	1198	-0.225331	0.0464789	0.919151
ILMN_2321720	2	2q33.1	CASP10	caspase 10	843	-0.226851	0.0489598	0.920838
ILMN_1810712	11	11q23.3	ARHGEF12	Rho guanine nucleotide exchange factor 12	23365	-0.227271	0.0279404	0.883778
ILMN_1747854	15	15q11.2	GOLGA8EP	golgin A8 family member E, pseudogene	390535	-0.228242	0.0454031	0.919151
ILMN_2284181	2	2p15	UGP2	UDP-glucose pyrophosphorylase 2	7360	-0.228553	0.0307628	0.886772
ILMN_1731648	12	12p13.31	FOXJ2	forkhead box J2	55810	-0.228865	0.0407544	0.91023
ILMN_1734472	8	8p21.3	PEBP4	phosphatidylethanolamine binding protein 4	157310	-0.229411	0.0479525	0.919151
ILMN_1685002	11	11q13.2	RCE1	Ras converting CAAX endopeptidase 1	9986	-0.231707	0.039412	0.906174
ILMN_1684450	21	21q22.3	UBASH3A	ubiquitin associated and SH3 domain containing A	53347	-0.232281	0.0228481	0.881578
ILMN_1674648	10	10p15.1	LINC00705	long intergenic non-protein coding RNA 705	338588	-0.232705	0.0320841	0.895639
ILMN_1675709	20	20q13.33	ARFGAP1	ADP ribosylation factor GTPase activating protein 1	55738	-0.233886	0.0462519	0.919151
ILMN_1750940	13	13q31.1	SLITRK1	SLIT and NTRK like family member 1	114798	-0.233949	0.0467094	0.919151
ILMN_1790472	10	10q24.2	SLC25A28	solute carrier family 25 member 28	81894	-0.234224	0.0299819	0.884938
ILMN_1651490	10	10q23.33	CYP26A1	cytochrome P450 family 26 subfamily A member 1	1592	-0.235573	0.0183369	0.860883
ILMN_3311010	3	3q25.33	MIR15B	microRNA 15b	406949	-0.236273	0.0201405	0.878534
ILMN_1764944	16	16p11.2	SLC6A10P	solute carrier family 6 member 10, pseudogene	386757	-0.236526	0.0223915	0.881578
ILMN_3236472	7	7q34	WEE2	WEE2 oocyte meiosis inhibiting kinase	494551	-0.236573	0.0447432	0.919151
ILMN_1763382	1	1p36.22	NPPB	natriuretic peptide B	4879	-0.237005	0.0459351	0.919151
ILMN_2374036	9	9q21.33	CTSL	cathepsin L	1514	-0.238073	0.0397389	0.906174
ILMN_1769993	9	9q34.3	LCN9	lipocalin 9	392399	-0.238188	0.0127741	0.837338
ILMN_1695965	1	1q44	COX20	cytochrome c oxidase assembly factor COX20	116228	-0.238971	0.0125024	0.837338
ILMN_1704452	1	1q21.2	BCL9	BCL9 transcription coactivator	607	-0.239155	0.0322044	0.895639
ILMN_2387303	6	6q24.3	SHPRH	SNF2 histone linker PHD RING helicase	257218	-0.239549	0.0492164	0.920838
ILMN_3259153	X	Xq27.3	FMR1-AS1	FMR1 antisense RNA 1	100126270	-0.239814	0.0398917	0.906174
ILMN_1739375	12	12q13.2	LACRT	lacritin	90070	-0.239933	0.0206543	0.878608
ILMN_1815205	12	12q15	LYZ	lysozyme	4069	-0.240052	0.030739	0.886772
ILMN_1685858	6	6p21.31	MLN	motilin	4295	-0.240406	0.0451043	0.919151
ILMN_1656139	10	10p12.31	SKIDA1	SKI/DACH domain containing 1	387640	-0.240679	0.0393104	0.906174
ILMN_1764764	19	19p13.3	PWWP3A	PWWP domain containing 3A, DNA repair factor	84939	-0.240755	0.0477552	0.919151
ILMN_1786108	11	11q12.3	TUT1	terminal uridylyl transferase 1, U6 snRNA-specific	64852	-0.241169	0.0313356	0.893571
ILMN_2082314	22	22q12.3	TOM1	target of myb1 membrane trafficking protein	10043	-0.242213	0.0270421	0.883778
ILMN_1811823	19	19q13.33	MED25	mediator complex subunit 25	81857	-0.242274	0.0491298	0.920838
ILMN_1782863	6	6p12.1	FAM83B	family with sequence similarity 83 member B	222584	-0.242657	0.0395719	0.906174
ILMN_3307874	1	1p36.11	CRYBG2	crystallin beta-gamma domain containing 2	55057	-0.244253	0.0481425	0.919151
ILMN_2409384	19	19q13.41	SIGLEC7	sialic acid binding Ig like lectin 7	27036	-0.244442	0.0350617	0.897431
ILMN_1712461	16	16q12.1	CBLN1	cerebellin 1 precursor	869	-0.244695	0.0251321	0.883147
ILMN_1809477	16	16p13.2	CARHSP1	calcium regulated heat stable protein 1	23589	-0.2447	0.0264386	0.883778
ILMN_3216496	7	7p12.2	SPATA48	spermatogenesis associated 48	100130988	-0.245003	0.0408675	0.91023
ILMN_1736317	13	13q32.3-q33.1	NALCN	sodium leak channel, non-selective	259232	-0.245914	0.023307	0.881578
ILMN_1722102	17	17q25.3	ANAPC11	anaphase promoting complex subunit 11	51529	-0.246171	0.0309887	0.890241
ILMN_1656988	19	19q13.42	FAM90A27P	family with sequence similarity 90 member A27, pseudogene	646508	-0.246415	0.0225373	0.881578
ILMN_1753329	1	1p34.1	PTCH2	patched 2	8643	-0.246603	0.0361039	0.901424
ILMN_1742179	1	1p13.3	FNDC7	fibronectin type III domain containing 7	163479	-0.246849	0.0319531	0.894622
ILMN_2201533	17	17p13.1	TMEM256	transmembrane protein 256	254863	-0.247323	0.0312672	0.89301
ILMN_1712556	11	11q23.2	ZW10	zw10 kinetochore protein	9183	-0.248009	0.0294678	0.883778
ILMN_2388517	12	12q23.3	MTERF2	mitochondrial transcription termination factor 2	80298	-0.248332	0.0216613	0.881578
ILMN_3309799	3	3q26.2	MIR569	microRNA 569	693154	-0.248601	0.0205748	0.878608
ILMN_2156982	2	2q21.1	IMP4	IMP U3 small nucleolar ribonucleoprotein 4	92856	-0.248672	0.0154073	0.837338
ILMN_1758731	1	1p32.1	CYP2J2	cytochrome P450 family 2 subfamily J member 2	1573	-0.248867	0.0238964	0.883147
ILMN_1769155	10	10q23.33	CYP2C8	cytochrome P450 family 2 subfamily C member 8	1558	-0.249447	0.0440749	0.919151
ILMN_1703335	15	15q22.2	LACTB	lactamase beta	114294	-0.249778	0.0352684	0.897431
ILMN_1660323	16	16p13.11	PDXDC1	pyridoxal dependent decarboxylase domain containing 1	23042	-0.249949	0.0499041	0.921034
ILMN_3300640	4	4p16.3	ZNF876P	zinc finger protein 876, pseudogene	642280	-0.250232	0.0292026	0.883778
ILMN_1662038	22	22q12.3	LARGE1	LARGE xylosyl- and glucuronyltransferase 1	9215	-0.250457	0.018712	0.868255
ILMN_1760369	1	1p35.1	TSSK3	testis specific serine kinase 3	81629	-0.250886	0.0322044	0.895639
ILMN_1811238	18	18q21.31-q21.32	ALPK2	alpha kinase 2	115701	-0.250962	0.0170215	0.848184
ILMN_1748707	22	22q13.33	CRELD2	cysteine rich with EGF like domains 2	79174	-0.251548	0.0408763	0.91023
ILMN_1797793	19	19q13.2	BLVRB	biliverdin reductase B	645	-0.251802	0.0479753	0.919151
ILMN_2202239	5	5q23.2	ZNF474	zinc finger protein 474	133923	-0.252351	0.0328172	0.895639
ILMN_2161222	13	13q14.13	CBY2	chibby family member 2	220082	-0.253102	0.0470255	0.919151
ILMN_1775579	3	3q21.3	ACAD9	acyl-CoA dehydrogenase family member 9	28976	-0.253611	0.0331257	0.895639
ILMN_1747227	1	1q32.1	ADORA1	adenosine A1 receptor	134	-0.25652	0.0207307	0.878608
ILMN_1782389	1	1q32.1	LAD1	ladinin 1	3898	-0.257461	0.0295247	0.883778
ILMN_1792825	3	3p21.31	ARIH2	ariadne RBR E3 ubiquitin protein ligase 2	10425	-0.257821	0.0145387	0.837338
ILMN_2059535	22	22q11.22	PPM1F	protein phosphatase, Mg2+/Mn2+ dependent 1F	9647	-0.258036	0.0233329	0.881578
ILMN_1663681	8	8q12.1	SNORD54	small nucleolar RNA, C/D box 54	26795	-0.258536	0.0297999	0.884921
ILMN_1652065	5	5q35.1	KCNMB1	potassium calcium-activated channel subfamily M regulatory beta subunit 1	3779	-0.258959	0.0286589	0.883778
ILMN_3235334	2	2p13.3	SNORA36C	small nucleolar RNA, H/ACA box 36C	100124535	-0.259225	0.0333661	0.895639
ILMN_1690170	1	1q23.1	CRABP2	cellular retinoic acid binding protein 2	1382	-0.25945	0.0376265	0.906174
ILMN_3287464	14	14q32.33	LINC00221	long intergenic non-protein coding RNA 221	338005	-0.260557	0.0472218	0.919151
ILMN_2251759	14	14q22.1	FRMD6	FERM domain containing 6	122786	-0.26116	0.0299548	0.884938
ILMN_2085844	3	3p13	GXYLT2	glucoside xylosyltransferase 2	727936	-0.261927	0.0401547	0.906174
ILMN_2190541	X	Xp11.22	XAGE2	X antigen family member 2	9502	-0.262465	0.0247085	0.883147
ILMN_1795463	X	Xq22.3	MORC4	MORC family CW-type zinc finger 4	79710	-0.262834	0.0391956	0.906174
ILMN_2335557	10	10p14	ITIH5	inter-alpha-trypsin inhibitor heavy chain 5	80760	-0.263	0.0206185	0.878608
ILMN_3309001	18	18q11.2	MIR1-2	microRNA 1-2	406905	-0.263101	0.0200278	0.878534
ILMN_1698164	1	1p36.33	LOC729737	uncharacterized LOC729737	729737	-0.263249	0.035477	0.897431
ILMN_2059606	22	22q12.1	CCDC117	coiled-coil domain containing 117	150275	-0.263553	0.0281724	0.883778
ILMN_3241524	6	6p21.32	ZBTB22	zinc finger and BTB domain containing 22	9278	-0.264235	0.0224894	0.881578
ILMN_2177460	15	15q14	AQR	aquarius intron-binding spliceosomal factor	9716	-0.264629	0.0338728	0.895639
ILMN_1780291	16	16q22.1	NFAT5	nuclear factor of activated T cells 5	10725	-0.26482	0.0416471	0.911396
ILMN_2203149	12	12q13.12	TMPRSS12	transmembrane serine protease 12	283471	-0.264835	0.0142542	0.837338
ILMN_1670542	1	1p35.1	AK2	adenylate kinase 2	204	-0.265134	0.0250307	0.883147
ILMN_1730867	19	19p13.3	AZU1	azurocidin 1	566	-0.265382	0.0422459	0.914758
ILMN_1666986	6	6p24.3-p24.2	GCNT2	glucosaminyl (N-acetyl) transferase 2 (I blood group)	2651	-0.265661	0.0184033	0.860883
ILMN_2175112	2	2p24.2	KCNS3	potassium voltage-gated channel modifier subfamily S member 3	3790	-0.265865	0.0273093	0.883778
ILMN_1805404	9	9q34.3	GRIN1	glutamate ionotropic receptor NMDA type subunit 1	2902	-0.266061	0.023147	0.881578
ILMN_3234884	16	16p11.2	KIF22	kinesin family member 22	3835	-0.26607	0.0398677	0.906174
ILMN_1678255	17	17p13.1	ALOXE3	arachidonate lipoxygenase 3	59344	-0.266106	0.0403737	0.908532
ILMN_1668546	7	7p15.3	STK31	serine/threonine kinase 31	56164	-0.266521	0.020227	0.878608
ILMN_1693014	20	20q13.13	CEBPB	CCAAT enhancer binding protein beta	1051	-0.267185	0.0177053	0.854532
ILMN_1757627	9	9q34.3	ZMYND19	zinc finger MYND-type containing 19	116225	-0.267839	0.0496145	0.920838
ILMN_3241985	5	5q22.1	SNORA13	small nucleolar RNA, H/ACA box 13	654322	-0.268119	0.00889079	0.837338
ILMN_1664028	20	20p13	CENPB	centromere protein B	1059	-0.268152	0.0374449	0.906174
ILMN_3308220	12	12q13.12	MIR1293	microRNA 1293	100302220	-0.268679	0.0346117	0.895639
ILMN_1772177	6	6q16.3	ASCC3	activating signal cointegrator 1 complex subunit 3	10973	-0.268721	0.0399655	0.906174
ILMN_2358474	21	21q22.3	TMPRSS3	transmembrane serine protease 3	64699	-0.269418	0.0223374	0.881578
ILMN_1743911	17	17q21.31	SLC25A39	solute carrier family 25 member 39	51629	-0.269537	0.0378676	0.906174
ILMN_1656624	6	6q27	LINC01558	long intergenic non-protein coding RNA 1558	26238	-0.269766	0.0263748	0.883778
ILMN_1804656	12	12q13.12	COX14	cytochrome c oxidase assembly factor COX14	84987	-0.270055	0.0363852	0.90179
ILMN_1796756	8	8q21.13	FABP12	fatty acid binding protein 12	646486	-0.270938	0.0209432	0.881578
ILMN_1681668	22	22q13.1	GGA1	golgi associated, gamma adaptin ear containing, ARF binding protein 1	26088	-0.270961	0.0462038	0.919151
ILMN_1791923	12	12p13.31	ACSM4	acyl-CoA synthetase medium chain family member 4	341392	-0.27127	0.0328862	0.895639
ILMN_3250592	16	16p13.3	EEF2KMT	eukaryotic elongation factor 2 lysine methyltransferase	196483	-0.27158	0.0254005	0.883147
ILMN_1668451	7	7q31.32	LMOD2	leiomodin 2	442721	-0.271866	0.0439661	0.919151
ILMN_1651370	1	1q23.3	USP21	ubiquitin specific peptidase 21	27005	-0.271875	0.0103222	0.837338
ILMN_1682567	19	19q13.42	CCDC106	coiled-coil domain containing 106	29903	-0.271992	0.0426677	0.916202
ILMN_2412860	8	8q11.21	MCM4	minichromosome maintenance complex component 4	4173	-0.272378	0.0122396	0.837338
ILMN_1692295	7	7p13	MYO1G	myosin IG	64005	-0.273099	0.0359518	0.901424
ILMN_1776375	19	19p13.2	PIN1	peptidylprolyl cis/trans isomerase, NIMA-interacting 1	5300	-0.273244	0.011154	0.837338
ILMN_1703183	2	2q21.1	GPR148	G protein-coupled receptor 148	344561	-0.273277	0.0262894	0.883778
ILMN_1758806	21	21q22.3	CFAP410	cilia and flagella associated protein 410	755	-0.27335	0.0213156	0.881578
ILMN_1728218	8	8p12	RBPMS	RNA binding protein, mRNA processing factor	11030	-0.274218	0.0408807	0.91023
ILMN_1721093	11	11p15.4	TAF10	TATA-box binding protein associated factor 10	6881	-0.274438	0.0468396	0.919151
ILMN_1716680	3	3p26.1	GRM7	glutamate metabotropic receptor 7	2917	-0.274499	0.046439	0.919151
ILMN_1797933	11	11p15.4	MRPL17	mitochondrial ribosomal protein L17	63875	-0.274517	0.0252921	0.883147
ILMN_1812031	19	19p13.3	PALM	paralemmin	5064	-0.27465	0.0242269	0.883147
ILMN_3308642	8	8p23.1	MIR597	microRNA 597	693182	-0.274882	0.0146049	0.837338
ILMN_2238640	9	9p24.2	RFX3	regulatory factor X3	5991	-0.275815	0.0444679	0.919151
ILMN_1654613	17	17q21.1	THRA	thyroid hormone receptor alpha	7067	-0.276028	0.0052426	0.837338
ILMN_1756826	2	2p22.1	MORN2	MORN repeat containing 2	729967	-0.277403	0.0353059	0.897431
ILMN_1670256	2	2q31.1	PDK1	pyruvate dehydrogenase kinase 1	5163	-0.277666	0.0492243	0.920838
ILMN_1715991	2	2q32.3	CAVIN2	caveolae associated protein 2	8436	-0.278108	0.0462212	0.919151
ILMN_1739885	3	3q21.2-q21.3	SLC41A3	solute carrier family 41 member 3	54946	-0.27878	0.0365605	0.90179
ILMN_1779051	19	19q13.2	CYP2A7	cytochrome P450 family 2 subfamily A member 7	1549	-0.279593	0.0414491	0.91088
ILMN_2299612	2	2p11.2	TMEM150A	transmembrane protein 150A	129303	-0.280316	0.0381772	0.906174
ILMN_3296436	10	10p12.31	LOC100130992	uncharacterized LOC100130992	100130992	-0.280656	0.0197304	0.875451
ILMN_1651456	Y	Yq11.221	UTY	ubiquitously transcribed tetratricopeptide repeat containing, Y-linked	7404	-0.280971	0.00707666	0.837338
ILMN_2203588	4	4p16.3	MYL5	myosin light chain 5	4636	-0.281149	0.0445392	0.919151
ILMN_1815230	11	11p15.4	OR51I1	olfactory receptor family 51 subfamily I member 1	390063	-0.281516	0.0346159	0.895639
ILMN_1776685	10	10q21.1	PCDH15	protocadherin related 15	65217	-0.281699	0.039928	0.906174
ILMN_3310326	X	Xp11.3	MIR221	microRNA 221	407006	-0.281984	0.0381001	0.906174
ILMN_1667857	12	12q24.13	RITA1	RBPJ interacting and tubulin associated 1	84934	-0.282322	0.0217129	0.881578
ILMN_1725679	8	8p23.3	ZNF596	zinc finger protein 596	169270	-0.282408	0.0288865	0.883778
ILMN_1760985	1	1q21.1	HJV	hemojuvelin BMP co-receptor	148738	-0.283682	0.00851976	0.837338
ILMN_3238680	7	7q34	FMC1	formation of mitochondrial complex V assembly factor 1 homolog	154791	-0.283748	0.0371313	0.904409
ILMN_1682864	16	16p13.3	SPSB3	splA/ryanodine receptor domain and SOCS box containing 3	90864	-0.284996	0.0253229	0.883147
ILMN_3310103	8	8q22.2	MIR875	microRNA 875	100126309	-0.285065	0.0473647	0.919151
ILMN_1784352	7	7p13	CCM2	CCM2 scaffold protein	83605	-0.285136	0.0455481	0.919151
ILMN_1669377	1	1p13.2	AP4B1	adaptor related protein complex 4 subunit beta 1	10717	-0.286526	0.0189239	0.869433
ILMN_2365644	19	19p13.3	PTPRS	protein tyrosine phosphatase receptor type S	5802	-0.286772	0.0496423	0.920838
ILMN_1808379	2	2q35	PLCD4	phospholipase C delta 4	84812	-0.286968	0.0239067	0.883147
ILMN_1734951	22	22q11.21	GSC2	goosecoid homeobox 2	2928	-0.287113	0.0336563	0.895639
ILMN_2413158	7	7q32.3	PODXL	podocalyxin like	5420	-0.287241	0.0459628	0.919151
ILMN_1680777	17	17p11.2	MAP2K3	mitogen-activated protein kinase kinase 3	5606	-0.28729	0.00823557	0.837338
ILMN_1676010	12	12q13.13	SP1	Sp1 transcription factor	6667	-0.28832	0.0117948	0.837338
ILMN_1686082	14	14q32.33	CLBA1	clathrin binding box of aftiphilin containing 1	122616	-0.288376	0.0367535	0.90179
ILMN_1773621	2	2p13.3	OR7E91P	olfactory receptor family 7 subfamily E member 91 pseudogene	79315	-0.288485	0.0127641	0.837338
ILMN_1671452	2	2q36.1	MRPL44	mitochondrial ribosomal protein L44	65080	-0.289026	0.0351272	0.897431
ILMN_1703330	5	5q22.3	FEM1C	fem-1 homolog C	56929	-0.289354	0.0465348	0.919151
ILMN_2398408	X	Xq22.2	TCEAL1	transcription elongation factor A like 1	9338	-0.289447	0.0225534	0.881578
ILMN_2247226	17	17q25.3	BAIAP2	BAR/IMD domain containing adaptor protein 2	10458	-0.289803	0.0468231	0.919151
ILMN_3221499	7	7q11.21	ZNF735	zinc finger protein 735	730291	-0.28999	0.0461899	0.919151
ILMN_1772796	17	17q22	DYNLL2	dynein light chain LC8-type 2	140735	-0.290088	0.046052	0.919151
ILMN_3249419	4	4q26	LINC01061	long intergenic non-protein coding RNA 1061	401149	-0.290359	0.0256611	0.883778
ILMN_1657746	6	6p25.2	BPHL	biphenyl hydrolase like	670	-0.290674	0.0425509	0.915995
ILMN_1706511	22	22q13.2	TEF	TEF transcription factor, PAR bZIP family member	7008	-0.290722	0.0458144	0.919151
ILMN_1690282	12	12q22	CRADD	CASP2 and RIPK1 domain containing adaptor with death domain	8738	-0.290773	0.042541	0.915995
ILMN_1796113	12	12q13.12	BCDIN3D	BCDIN3 domain containing RNA methyltransferase	144233	-0.29149	0.0307066	0.886772
ILMN_1680339	8	8p22	PDGFRL	platelet derived growth factor receptor like	5157	-0.291848	0.045085	0.919151
ILMN_1676192	17	17p13.1	SLC13A5	solute carrier family 13 member 5	284111	-0.291925	0.0127384	0.837338
ILMN_1679301	8	8q24.22	ZFAT	zinc finger and AT-hook domain containing	57623	-0.292	0.0291414	0.883778
ILMN_2171649	19	19q13.33	CGB2	chorionic gonadotropin subunit beta 2	114336	-0.292572	0.0121798	0.837338
ILMN_1805561	18	18q12.3	SLC14A1	solute carrier family 14 member 1 (Kidd blood group)	6563	-0.292577	0.0290623	0.883778
ILMN_1663620	12	12q13.2	GLYCAM1	glycosylation dependent cell adhesion molecule 1 (pseudogene)	644076	-0.292865	0.0344524	0.895639
ILMN_2075818	16	16p13.3	ZNF598	zinc finger protein 598, E3 ubiquitin ligase	90850	-0.293049	0.0407798	0.91023
ILMN_1701386	2	2q33.1	STRADB	STE20 related adaptor beta	55437	-0.293066	0.0394638	0.906174
ILMN_1799815	17	17q21.33	XYLT2	xylosyltransferase 2	64132	-0.293082	0.0477383	0.919151
ILMN_3242551	1	1q23.3	SDHC	succinate dehydrogenase complex subunit C	6391	-0.293204	0.0271449	0.883778
ILMN_2242998	19	19p12	ZNF682	zinc finger protein 682	91120	-0.293364	0.0224256	0.881578
ILMN_2204826	5	5p12	SELENOP	selenoprotein P	6414	-0.294109	0.0443387	0.919151
ILMN_1810797	13	13q12.13	WASF3	WASP family member 3	10810	-0.295442	0.0401008	0.906174
ILMN_1812571	12	12q24.23	RAB35	RAB35, member RAS oncogene family	11021	-0.295892	0.0207111	0.878608
ILMN_1815639	7	7q22.1	GIGYF1	GRB10 interacting GYF protein 1	64599	-0.29646	0.0247341	0.883147
ILMN_1764850	2	2p25.1	HPCAL1	hippocalcin like 1	3241	-0.296743	0.0460003	0.919151
ILMN_1736223	15	15q23	IQCH	IQ motif containing H	64799	-0.297281	0.0448219	0.919151
ILMN_3311115	2	2q21.2	MIR663B	microRNA 663b	100313824	-0.297586	0.0211388	0.881578
ILMN_2116714	1	1q21.3	SLC39A1	solute carrier family 39 member 1	27173	-0.298124	0.0465891	0.919151
ILMN_1689119	17	17q25.1	UNK	unk zinc finger	85451	-0.298339	0.029847	0.884921
ILMN_1735955	2	2q14.1	RPL23AP7	ribosomal protein L23a pseudogene 7	118433	-0.298861	0.0254344	0.883147
ILMN_1773780	16	16p13.3	ANTKMT	adenine nucleotide translocase lysine methyltransferase	65990	-0.299362	0.0435563	0.919151
ILMN_1656327	12	12q24.33	GLT1D1	glycosyltransferase 1 domain containing 1	144423	-0.300102	0.0206551	0.878608
ILMN_1794505	7	7q21.3	SEM1	SEM1 26S proteasome complex subunit	7979	-0.301349	0.0466857	0.919151
ILMN_1657095	17	17q12	STARD3	StAR related lipid transfer domain containing 3	10948	-0.301421	0.0480602	0.919151
ILMN_1800197	5	5p15.33	MRPL36	mitochondrial ribosomal protein L36	64979	-0.301695	0.0120845	0.837338
ILMN_1725072	19	19q13.11	DPY19L3	dpy-19 like C-mannosyltransferase 3	147991	-0.301724	0.0264571	0.883778
ILMN_1683774	10	10p15.1	IL2RA	interleukin 2 receptor subunit alpha	3559	-0.301972	0.0399377	0.906174
ILMN_1669928	1	1p36.32	ARHGEF16	Rho guanine nucleotide exchange factor 16	27237	-0.302027	0.0157827	0.837338
ILMN_2342554	3	3q13.2	TAGLN3	transgelin 3	29114	-0.302159	0.0422974	0.914758
ILMN_1736481	9	9q22.2	SECISBP2	SECIS binding protein 2	79048	-0.302218	0.0242759	0.883147
ILMN_2154052	18	18q21.33	KDSR	3-ketodihydrosphingosine reductase	2531	-0.302278	0.0265405	0.883778
ILMN_1759396	5	5p12	NNT	nicotinamide nucleotide transhydrogenase	23530	-0.303135	0.0477299	0.919151
ILMN_1814917	19	19p13.3	TLE2	TLE family member 2, transcriptional corepressor	7089	-0.30346	0.0310123	0.890241
ILMN_1706775	7	7p13	GCK	glucokinase	2645	-0.303553	0.0316517	0.894622
ILMN_1737211	19	19q13.12	ZNF585A	zinc finger protein 585A	199704	-0.303659	0.0358835	0.901125
ILMN_1680569	X	Xp11.23	SSX5	SSX family member 5	6758	-0.304151	0.0227994	0.881578
ILMN_1673987	8	8p23.1	DEFB134	defensin beta 134	613211	-0.304246	0.0337277	0.895639
ILMN_1651752	X	Xp21.2	TASL	TLR adaptor interacting with endolysosomal SLC15A4	80231	-0.304257	0.0253803	0.883147
ILMN_1781400	8	8p22	SLC7A2	solute carrier family 7 member 2	6542	-0.304348	0.041486	0.91088
ILMN_1745806	17	17p11.2	PEMT	phosphatidylethanolamine N-methyltransferase	10400	-0.304476	0.0248821	0.883147
ILMN_1791796	8	8q21.3	MMP16	matrix metallopeptidase 16	4325	-0.304574	0.0129471	0.837338
ILMN_1728699	11	11p15.1	SPTY2D1	SPT2 chromatin protein domain containing 1	144108	-0.305441	0.0285083	0.883778
ILMN_2381296	14	14q24.3	GSTZ1	glutathione S-transferase zeta 1	2954	-0.305767	0.00371323	0.837338
ILMN_1663158	16	16p13.3	ZNF174	zinc finger protein 174	7727	-0.305951	0.0446928	0.919151
ILMN_2367275	7	7q11.23	BCL7B	BAF chromatin remodeling complex subunit BCL7B	9275	-0.306041	0.0199223	0.876452
ILMN_1653358	19	19p13.3	FUT3	fucosyltransferase 3 (Lewis blood group)	2525	-0.306224	0.0318763	0.894622
ILMN_1795464	6	6p21.33	LTA	lymphotoxin alpha	4049	-0.306947	0.0363549	0.90179
ILMN_2246410	2	2q22.1	CXCR4	C-X-C motif chemokine receptor 4	7852	-0.307255	0.0126885	0.837338
ILMN_1763869	8	8q24.3	ADGRB1	adhesion G protein-coupled receptor B1	575	-0.307751	0.0491421	0.920838
ILMN_1704139	c("X", "Y")	c("Xp22.33", "Yp11.2")	DHRSX	dehydrogenase/reductase X-linked	207063	-0.30904	0.00899008	0.837338
ILMN_1791726	16	16q24.3	TUBB3	tubulin beta 3 class III	10381	-0.309179	0.0369393	0.902071
ILMN_2123743	1	1q23.3	FCER1G	Fc fragment of IgE receptor Ig	2207	-0.309192	0.0126763	0.837338
ILMN_1674855	4	4q26	TRAM1L1	translocation associated membrane protein 1 like 1	133022	-0.309251	0.0406915	0.91023
ILMN_1782994	18	18q12.1	WBP11P1	WBP11 pseudogene 1	441818	-0.310375	0.0404709	0.909257
ILMN_1790918	18	18q23	ZNF236	zinc finger protein 236	7776	-0.310548	0.0378254	0.906174
ILMN_2170476	5	5q31.3	PCDHB18P	protocadherin beta 18 pseudogene	54660	-0.310569	0.023421	0.881578
ILMN_1725644	5	5q31.2	UBE2D2	ubiquitin conjugating enzyme E2 D2	7322	-0.310944	0.0255264	0.883778
ILMN_3251491	8	8q22.1	UQCRB	ubiquinol-cytochrome c reductase binding protein	7381	-0.311259	0.0471137	0.919151
ILMN_1720531	19	19p13.3	KDM4B	lysine demethylase 4B	23030	-0.311893	0.0284065	0.883778
ILMN_1696843	16	16p11.2	NPIPB13	nuclear pore complex interacting protein family, member B13	613037	-0.311922	0.0226046	0.881578
ILMN_1655519	8	8p23.1	FAM90A14P	putative protein FAM90A14	645651	-0.312098	0.0396814	0.906174
ILMN_2066858	13	13q33.3	TNFSF13B	TNF superfamily member 13b	10673	-0.313224	0.0300911	0.884938
ILMN_1773174	16	16p13.3	PDPK1	3-phosphoinositide dependent protein kinase 1	5170	-0.313383	0.0138054	0.837338
ILMN_1805469	21	21q22.11	KRTAP19-5	keratin associated protein 19-5	337972	-0.313471	0.00364411	0.837338
ILMN_2069912	X	Xq28	MAGEA8	MAGE family member A8	4107	-0.313999	0.0206272	0.878608
ILMN_1798212	17	17p11.2	LLGL1	LLGL scribble cell polarity complex component 1	3996	-0.314602	0.0222928	0.881578
ILMN_1728785	6	6p12.3	ADGRF5	adhesion G protein-coupled receptor F5	221395	-0.314942	0.0211007	0.881578
ILMN_1727281	11	11q12.3	TAF6L	TATA-box binding protein associated factor 6 like	10629	-0.315058	0.0319544	0.894622
ILMN_1677805	1	1q42.12	DNAH14	dynein axonemal heavy chain 14	127602	-0.315269	0.0221013	0.881578
ILMN_1770161	4	4p15.32	BST1	bone marrow stromal cell antigen 1	683	-0.315781	0.0393809	0.906174
ILMN_1753008	19	19p13.3	REXO1	RNA exonuclease 1 homolog	57455	-0.316017	0.032965	0.895639
ILMN_1735591	12	12q14.1	AGAP2	ArfGAP with GTPase domain, ankyrin repeat and PH domain 2	116986	-0.31623	0.00701265	0.837338
ILMN_1657871	2	2p25.2	RSAD2	radical S-adenosyl methionine domain containing 2	91543	-0.316496	0.0415433	0.911099
ILMN_1705617	11	11q13.1	CFL1	cofilin 1	1072	-0.316884	0.0326208	0.895639
ILMN_1804248	1	1q22	FDPS	farnesyl diphosphate synthase	2224	-0.317032	0.00858123	0.837338
ILMN_1771921	22	22q12.1	HSCB	HscB mitochondrial iron-sulfur cluster cochaperone	150274	-0.317277	0.0173273	0.850965
ILMN_2165762	19	19q13.33	SNORD34	small nucleolar RNA, C/D box 34	26817	-0.317286	0.0259481	0.883778
ILMN_1732782	2	2q24.3	SCN2A	sodium voltage-gated channel alpha subunit 2	6326	-0.317475	0.0324168	0.895639
ILMN_3246556	10	10q11.21	RSU1P2	Ras suppressor protein 1 pseudogene 2	100133308	-0.317501	0.0293634	0.883778
ILMN_2350357	19	19p12	ZNF254	zinc finger protein 254	9534	-0.318524	0.0398978	0.906174
ILMN_1808568	1	1q42.12	PYCR2	pyrroline-5-carboxylate reductase 2	29920	-0.318531	0.014232	0.837338
ILMN_1810651	X	Xq27.1	F9	coagulation factor IX	2158	-0.318804	0.00871638	0.837338
ILMN_2043452	6	6p21.31	FANCE	FA complementation group E	2178	-0.318986	0.00861961	0.837338
ILMN_3227440	18	18q21.2	LINC01630	long intergenic non-protein coding RNA 1630	100287225	-0.319195	0.0241945	0.883147
ILMN_1726512	15	15q25.2	ZSCAN2	zinc finger and SCAN domain containing 2	54993	-0.319859	0.0120988	0.837338
ILMN_1776852	17	17p13.3	TRARG1	trafficking regulator of GLUT4 (SLC2A4) 1	286753	-0.319882	0.00365573	0.837338
ILMN_1707670	3	3q28	CLDN16	claudin 16	10686	-0.319957	0.0492707	0.920838
ILMN_2293692	16	16p13.3	CREBBP	CREB binding protein	1387	-0.319987	0.0448526	0.919151
ILMN_1683212	8	8q22.3	SLC25A32	solute carrier family 25 member 32	81034	-0.320266	0.0317012	0.894622
ILMN_2339006	13	13q14.11	VWA8	von Willebrand factor A domain containing 8	23078	-0.320849	0.0159683	0.837338
ILMN_3269719	11	11q13.4	ARAP1	ArfGAP with RhoGAP domain, ankyrin repeat and PH domain 1	116985	-0.321201	0.0222073	0.881578
ILMN_3200234	19	19p13.3	DPP9-AS1	DPP9 antisense RNA 1	100131094	-0.321234	0.0202861	0.878608
ILMN_2413898	10	10p13	MCM10	minichromosome maintenance 10 replication initiation factor	55388	-0.322369	0.0206422	0.878608
ILMN_1671200	2	2q11.1	LOC442028	uncharacterized LOC442028	442028	-0.322456	0.0222396	0.881578
ILMN_2401618	17	17q21.2	MLX	MAX dimerization protein MLX	6945	-0.323837	0.0154567	0.837338
ILMN_1685873	22	22q13.2	ZC3H7B	zinc finger CCCH-type containing 7B	23264	-0.324504	0.0333368	0.895639
ILMN_1806186	11	11q12.1	P2RX3	purinergic receptor P2X 3	5024	-0.3252	0.0134601	0.837338
ILMN_2399328	9	9q34.3	NELFB	negative elongation factor complex member B	25920	-0.325673	0.0482937	0.919151
ILMN_1725773	10	10q21.3	DNAJC12	DnaJ heat shock protein family (Hsp40) member C12	56521	-0.32583	0.0155647	0.837338
ILMN_3310070	9	9q31.3	MIR32	microRNA 32	407036	-0.326809	0.0376367	0.906174
ILMN_1794677	17	17q25.3	TMC6	transmembrane channel like 6	11322	-0.326896	0.0490434	0.920838
ILMN_1694973	20	20p13	DEFB127	defensin beta 127	140850	-0.326914	0.0103898	0.837338
ILMN_1792931	1	1q21.3	LYSMD1	LysM domain containing 1	388695	-0.327499	0.0118808	0.837338
ILMN_1732343	11	11q23.3	SIK3	SIK family kinase 3	23387	-0.327783	0.034463	0.895639
ILMN_1713636	1	1q21.3	S100A6	S100 calcium binding protein A6	6277	-0.327966	0.0178754	0.854532
ILMN_1814316	16	16p13.3	RBFOX1	RNA binding fox-1 homolog 1	54715	-0.32851	0.0399683	0.906174
ILMN_2146761	8	8q21.13	FABP5	fatty acid binding protein 5	2171	-0.328554	0.0135896	0.837338
ILMN_1695193	1	1p31.3	ANGPTL3	angiopoietin like 3	27329	-0.32896	0.0431926	0.918451
ILMN_2210934	4	4q31.23	NR3C2	nuclear receptor subfamily 3 group C member 2	4306	-0.329123	0.0285876	0.883778
ILMN_3233993	1	1q32.1	CCNQP1	CCNQ pseudogene 1	339521	-0.329282	0.0484522	0.920518
ILMN_1746676	21	21q22.11	CLDN8	claudin 8	9073	-0.329481	0.00539715	0.837338
ILMN_3288218	2	2p25.3	RPS7	ribosomal protein S7	6201	-0.32962	0.0323209	0.895639
ILMN_1766204	11	11q13.1	GPHA2	glycoprotein hormone subunit alpha 2	170589	-0.329681	0.0109647	0.837338
ILMN_1776115	17	17q21.1	GSDMA	gasdermin A	284110	-0.32984	0.0153431	0.837338
ILMN_1664912	9	9p13.3	IL11RA	interleukin 11 receptor subunit alpha	3590	-0.329858	0.0443486	0.919151
ILMN_1760245	3	3p21.31	TMEM42	transmembrane protein 42	131616	-0.330694	0.0160651	0.837338
ILMN_3188165	9	9q21.2	VPS13A-AS1	VPS13A antisense RNA 1	100286938	-0.331403	0.0350614	0.897431
ILMN_1796923	16	16p12.3	REXO5	RNA exonuclease 5	81691	-0.3316	0.0293463	0.883778
ILMN_3233250	14	14q23.3	CCDC196	coiled-coil domain containing 196	440184	-0.331915	0.0045235	0.837338
ILMN_1694462	1	1q44	KIF26B	kinesin family member 26B	55083	-0.332523	0.0455326	0.919151
ILMN_1742782	6	6p21.33	GPANK1	G-patch domain and ankyrin repeats 1	7918	-0.332567	0.0413438	0.91088
ILMN_2052487	2	2q12.1	GPR45	G protein-coupled receptor 45	11250	-0.333325	0.00972985	0.837338
ILMN_2352926	7	7q33	BPGM	bisphosphoglycerate mutase	669	-0.333712	0.0169623	0.848184
ILMN_1680494	11	11q12.2	CPSF7	cleavage and polyadenylation specific factor 7	79869	-0.333834	0.0497594	0.920838
ILMN_1677837	11	11q14.3	UBTFL1	upstream binding transcription factor like 1	642623	-0.33385	0.0135315	0.837338
ILMN_1745957	6	6p21.1	ADCY10P1	ADCY10 pseudogene 1	221442	-0.334498	0.0125776	0.837338
ILMN_1783598	13	13q14.2	CAB39L	calcium binding protein 39 like	81617	-0.334541	0.0458125	0.919151
ILMN_1779742	1	1p36.33	GABRD	gamma-aminobutyric acid type A receptor subunit delta	2563	-0.334646	0.00904894	0.837338
ILMN_1780777	16	16q22.1	PDXDC2P-NPIPB14P	nuclear pore complex-interacting protein	283970	-0.3353	0.0392296	0.906174
ILMN_1673023	12	12q24.33	EP400	E1A binding protein p400	57634	-0.335526	0.0451937	0.919151
ILMN_1730631	2	2p23.3	WDCP	WD repeat and coiled coil containing	80304	-0.335724	0.00774531	0.837338
ILMN_1789828	9	9q21.2	VPS13A	vacuolar protein sorting 13 homolog A	23230	-0.336125	0.0412517	0.91088
ILMN_1799020	7	7q22.1	MUC12	mucin 12, cell surface associated	10071	-0.33618	0.0419014	0.912568
ILMN_1741459	16	16q24.3	CDK10	cyclin dependent kinase 10	8558	-0.336427	0.0139973	0.837338
ILMN_1801443	11	11q13.5	TSKU	tsukushi, small leucine rich proteoglycan	25987	-0.337303	0.0262099	0.883778
ILMN_1653553	14	14q32.33	TEDC1	tubulin epsilon and delta complex 1	283643	-0.337654	0.033383	0.895639
ILMN_1718898	12	12q13.13	HOXC9	homeobox C9	3225	-0.338144	0.00416039	0.837338
ILMN_1769329	15	15q24.3	LOC645752	golgin A6 family member A pseudogene	645752	-0.338382	0.00778773	0.837338
ILMN_1691409	4	4q21.22	SEC31A	SEC31 homolog A, COPII coat complex component	22872	-0.338576	0.0466554	0.919151
ILMN_1751744	19	19p13.11	ANKLE1	ankyrin repeat and LEM domain containing 1	126549	-0.338725	0.0115053	0.837338
ILMN_1656933	19	19q13.32	NKPD1	NTPase KAP family P-loop domain containing 1	284353	-0.338845	0.0498774	0.921034
ILMN_1701466	11	11p11.2	PEX16	peroxisomal biogenesis factor 16	9409	-0.338925	0.0131343	0.837338
ILMN_1813490	19	19p13.3	FSD1	fibronectin type III and SPRY domain containing 1	79187	-0.339148	0.0161688	0.837338
ILMN_1806655	X	Xp22.2	ARHGAP6	Rho GTPase activating protein 6	395	-0.339172	0.00251561	0.820678
ILMN_1728262	11	11p15.1	SAA2	serum amyloid A2	6289	-0.339369	0.0403184	0.907915
ILMN_2110167	9	9p13.2	POLR1E	RNA polymerase I subunit E	64425	-0.339394	0.0115546	0.837338
ILMN_1747556	9	9q34.11	CDK9	cyclin dependent kinase 9	1025	-0.339717	0.00288692	0.820678
ILMN_2121316	1	1q24.2	GORAB	golgin, RAB6 interacting	92344	-0.339736	0.00714433	0.837338
ILMN_1777096	12	12q23.3	TDG	thymine DNA glycosylase	6996	-0.340088	0.0100439	0.837338
ILMN_3239223	X	Xq21.1	UBE2DNL	ubiquitin conjugating enzyme E2 D N-terminal like (pseudogene)	100131816	-0.340913	0.00832385	0.837338
ILMN_1703441	1	1p36.11	ZNF593	zinc finger protein 593	51042	-0.341531	0.00264497	0.820678
ILMN_1737631	1	1q22	PAQR6	progestin and adipoQ receptor family member 6	79957	-0.341962	0.0387183	0.906174
ILMN_1692589	5	5q13.3	ZBED3-AS1	ZBED3 antisense RNA 1	728723	-0.342088	0.00574351	0.837338
ILMN_1777314	7	7q22.1	CNPY4	canopy FGF signaling regulator 4	245812	-0.342248	0.0485997	0.920617
ILMN_1663263	1	1p34.3	EPHA10	EPH receptor A10	284656	-0.342315	0.0290603	0.883778
ILMN_1812321	1	1p36.13	FAM131C	family with sequence similarity 131 member C	348487	-0.342415	0.0327533	0.895639
ILMN_1708340	9	9q21.33	DAPK1	death associated protein kinase 1	1612	-0.342442	0.0469291	0.919151
ILMN_1651741	X	Xq22.1	ARMCX3	armadillo repeat containing X-linked 3	51566	-0.342666	0.0389718	0.906174
ILMN_2149164	8	8p11.21	SFRP1	secreted frizzled related protein 1	6422	-0.342761	0.0261695	0.883778
ILMN_1724350	5	5q22.3	TRIM36	tripartite motif containing 36	55521	-0.344376	0.0107483	0.837338
ILMN_1792182	14	14q24.1	RDH12	retinol dehydrogenase 12	145226	-0.344456	0.0209	0.881578
ILMN_2070896	2	2q33.1-q33.2	BMPR2	bone morphogenetic protein receptor type 2	659	-0.344641	0.0341072	0.895639
ILMN_2395926	20	20q11.23	MANBAL	mannosidase beta like	63905	-0.345093	0.033174	0.895639
ILMN_1792679	12	12q13.13	ITGA5	integrin subunit alpha 5	3678	-0.34518	0.0491199	0.920838
ILMN_1797693	12	12q24.31	BRI3BP	BRI3 binding protein	140707	-0.345306	0.017462	0.85282
ILMN_1800179	22	22q13.1	KCNJ4	potassium inwardly rectifying channel subfamily J member 4	3761	-0.345737	0.0438904	0.919151
ILMN_3258356	12	12q14.3	RPSAP52	ribosomal protein SA pseudogene 52	204010	-0.345928	0.0322534	0.895639
ILMN_3309349	4	4q26	SNHG8	small nucleolar RNA host gene 8	100093630	-0.346215	0.027047	0.883778
ILMN_2209578	10	10q11.23	AGAP6	ArfGAP with GTPase domain, ankyrin repeat and PH domain 6	414189	-0.346413	0.015407	0.837338
ILMN_1666121	7	7p14.3	FKBP9	FKBP prolyl isomerase 9	11328	-0.346979	0.0202515	0.878608
ILMN_1667361	17	17q21.32	COPZ2	COPI coat complex subunit zeta 2	51226	-0.347153	0.0101244	0.837338
ILMN_1683447	9	9q33.3	RPL35	ribosomal protein L35	11224	-0.347191	0.0204891	0.878608
ILMN_2294442	15	15q11.2	SNURF	SNRPN upstream reading frame	8926	-0.347235	0.0340826	0.895639
ILMN_1820244	12	12q24.31	NRAV	negative regulator of antiviral response	100506668	-0.347252	0.00759341	0.837338
ILMN_1728844	7	7q36.3	PTPRN2	protein tyrosine phosphatase receptor type N2	5799	-0.348345	0.00834458	0.837338
ILMN_1775997	10	10q11.23	CHAT	choline O-acetyltransferase	1103	-0.348528	0.0223439	0.881578
ILMN_3202863	2	2q13	SEPTIN10	septin 10	151011	-0.348649	0.00542819	0.837338
ILMN_1682636	4	4q13.3	CXCL2	C-X-C motif chemokine ligand 2	2920	-0.349338	0.00998411	0.837338
ILMN_1669413	15	15q13.2	LINC02249	long intergenic non-protein coding RNA 2249	26082	-0.349442	0.0111127	0.837338
ILMN_1717579	17	17q23.2	C17orf64	chromosome 17 open reading frame 64	124773	-0.349959	0.0379262	0.906174
ILMN_1791052	6	6p21.32	FKBPL	FKBP prolyl isomerase like	63943	-0.350608	0.0435575	0.919151
ILMN_2201668	1	1q24.2	SLC19A2	solute carrier family 19 member 2	10560	-0.350613	0.0178578	0.854532
ILMN_2274180	20	20p12.2	MKKS	McKusick-Kaufman syndrome	8195	-0.350699	0.0430793	0.918221
ILMN_3243773	4	4q34.1	GALNTL6	polypeptide N-acetylgalactosaminyltransferase like 6	442117	-0.350912	0.0190626	0.871619
ILMN_3241140	1	1q42.3	SNORA14B	small nucleolar RNA, H/ACA box 14B	677802	-0.351047	0.02588	0.883778
ILMN_1783805	X	Xq28	PNMA3	PNMA family member 3	29944	-0.351215	0.0230735	0.881578
ILMN_1666221	9	9q22.31	ANKRD19P	ankyrin repeat domain 19, pseudogene	138649	-0.352013	0.0466355	0.919151
ILMN_1793966	1	1q21.2	BOLA1	bolA family member 1	51027	-0.352439	0.037374	0.906174
ILMN_3235104	11	11q21	CEP295	centrosomal protein 295	85459	-0.353397	0.00977193	0.837338
ILMN_2267365	11	11p15.4	AKIP1	A-kinase interacting protein 1	56672	-0.353987	0.0427859	0.916202
ILMN_1711504	2	2p16.3	NRXN1	neurexin 1	9378	-0.353993	0.00484537	0.837338
ILMN_1715988	8	8p23.1	SLC35G5	solute carrier family 35 member G5	83650	-0.354163	0.0311193	0.891088
ILMN_1675124	22	22q13.1	DDX17	DEAD-box helicase 17	10521	-0.354258	0.0311937	0.891737
ILMN_1776577	8	8q24.12	DSCC1	DNA replication and sister chromatid cohesion 1	79075	-0.35426	0.00346898	0.830532
ILMN_2301677	19	19q13.32	MEIS3	Meis homeobox 3	56917	-0.35457	0.00713742	0.837338
ILMN_3248906	X	Xq11.2	ZC4H2	zinc finger C4H2-type containing	55906	-0.354928	0.0224131	0.881578
ILMN_2212690	16	16p13.13	ZC3H7A	zinc finger CCCH-type containing 7A	29066	-0.355432	0.0328288	0.895639
ILMN_1687291	10	10p13	CDNF	cerebral dopamine neurotrophic factor	441549	-0.355552	0.0155423	0.837338
ILMN_2317580	22	22q13.33	SHANK3	SH3 and multiple ankyrin repeat domains 3	85358	-0.355729	0.0193874	0.875175
ILMN_1652424	11	11q12.1	OR1S1	olfactory receptor family 1 subfamily S member 1	219959	-0.356035	0.01969	0.875175
ILMN_2125451	11	11q14.3	TRIM49	tripartite motif containing 49	57093	-0.356036	0.0171894	0.8497
ILMN_2298795	19	19p13.3	KIR2DL5A	killer cell immunoglobulin like receptor, two Ig domains and long cytoplasmic tail 5A	57292	-0.357014	0.00737163	0.837338
ILMN_1811696	17	17q25.1	FDXR	ferredoxin reductase	2232	-0.357434	0.0394015	0.906174
ILMN_3247111	8	8q21.3	LRRC69	leucine rich repeat containing 69	100130742	-0.357441	0.0340357	0.895639
ILMN_1652378	11	11p15.4	IPO7	importin 7	10527	-0.357666	0.0106512	0.837338
ILMN_1777982	1	1q23.3	USF1	upstream transcription factor 1	7391	-0.358289	0.0497599	0.920838
ILMN_3307668	15	15q11.2	MKRN3	makorin ring finger protein 3	7681	-0.35964	0.044465	0.919151
ILMN_3251728	15	15q13.3	MTMR10	myotubularin related protein 10	54893	-0.3598	0.0250684	0.883147
ILMN_1662214	12	12q23.2	PAH	phenylalanine hydroxylase	5053	-0.361193	0.00325024	0.825351
ILMN_1656434	3	3p21.31	IP6K1	inositol hexakisphosphate kinase 1	9807	-0.361288	0.0124131	0.837338
ILMN_1810844	7	7q36.1	RARRES2	retinoic acid receptor responder 2	5919	-0.3613	0.0276214	0.883778
ILMN_1743055	8	8p22	NAT1	N-acetyltransferase 1	9	-0.361953	0.018996	0.870246
ILMN_1780659	4	4q28.1	NUDT6	nudix hydrolase 6	11162	-0.362075	0.0348113	0.895639
ILMN_3236373	3	3q22.3	MSL2	MSL complex subunit 2	55167	-0.362276	0.0183174	0.860883
ILMN_3249756	X	Xq28	DNASE1L1	deoxyribonuclease 1 like 1	1774	-0.362919	0.013819	0.837338
ILMN_1778668	11	11q23.3	TAGLN	transgelin	6876	-0.363256	0.0300944	0.884938
ILMN_1745005	7	7p14.3	GGCT	gamma-glutamylcyclotransferase	79017	-0.363272	0.0429865	0.917649
ILMN_3236866	3	3p22.1	ULK4	unc-51 like kinase 4	54986	-0.363375	0.0423903	0.914758
ILMN_1724822	10	10p11.1	LINC00999	long intergenic non-protein coding RNA 999	399744	-0.364083	0.0172797	0.850965
ILMN_2277676	19	19q13.32	ERCC1	ERCC excision repair 1, endonuclease non-catalytic subunit	2067	-0.364478	0.00717018	0.837338
ILMN_2215656	1	1p32.3	MAGOH	mago homolog, exon junction complex subunit	4116	-0.364541	0.00338915	0.82884
ILMN_1733428	14	14q11.2	RNASE11	ribonuclease A family member 11 (inactive)	122651	-0.365185	0.0244837	0.883147
ILMN_2113074	13	13q13.3	UFM1	ubiquitin fold modifier 1	51569	-0.366091	0.0482602	0.919151
ILMN_1777881	5	5q35.2	TSPAN17	tetraspanin 17	26262	-0.367016	0.00733085	0.837338
ILMN_1781276	1	1p36.13	TMCO4	transmembrane and coiled-coil domains 4	255104	-0.367736	0.0459544	0.919151
ILMN_1742548	9	9q34.13	GFI1B	growth factor independent 1B transcriptional repressor	8328	-0.36777	0.0165908	0.839918
ILMN_1719750	19	19q13.33	CGB1	chorionic gonadotropin subunit beta 1	114335	-0.368012	0.0203973	0.878608
ILMN_1729430	10	10p15.1	FBH1	F-box DNA helicase 1	84893	-0.368342	0.00667789	0.837338
ILMN_1792075	19	19q13.12	CD22	CD22 molecule	933	-0.368497	0.0381284	0.906174
ILMN_1776850	19	19p13.3	NMRK2	nicotinamide riboside kinase 2	27231	-0.368623	0.0280025	0.883778
ILMN_1798837	10	10q11.22	PTPN20	protein tyrosine phosphatase non-receptor type 20	26095	-0.369312	0.00632364	0.837338
ILMN_1769433	5	5q13.3	IQGAP2	IQ motif containing GTPase activating protein 2	10788	-0.36954	0.0247754	0.883147
ILMN_2391400	4	4q25	PITX2	paired like homeodomain 2	5308	-0.369609	0.00900221	0.837338
ILMN_2181670	1	1q32.2	SYT14	synaptotagmin 14	255928	-0.369694	0.0106086	0.837338
ILMN_3248032	19	19q13.2	NCCRP1	NCCRP1, F-box associated domain containing	342897	-0.37034	0.0196081	0.875175
ILMN_3235234	15	15q11.2	LINC02203	long intergenic non-protein coding RNA 2203	727924	-0.370618	0.0380622	0.906174
ILMN_1727135	9	9q34.12	FIBCD1	fibrinogen C domain containing 1	84929	-0.370956	0.00877653	0.837338
ILMN_3272500	14	14q32.12	IFI27L1	interferon alpha inducible protein 27 like 1	122509	-0.370975	0.0163059	0.837338
ILMN_1807123	6	6q15	SPACA1	sperm acrosome associated 1	81833	-0.371525	0.0479452	0.919151
ILMN_3236289	3	3q13.31	TIGIT	T cell immunoreceptor with Ig and ITIM domains	201633	-0.371681	0.0402033	0.906174
ILMN_2041463	3	3q13.32	TEX55	testis expressed 55	152405	-0.371862	0.00368724	0.837338
ILMN_1691876	12	12q14.1	TAFA2	TAFA chemokine like family member 2	338811	-0.372491	0.0229948	0.881578
ILMN_1739441	11	11q12.3	GANAB	glucosidase II alpha subunit	23193	-0.372621	0.0136779	0.837338
ILMN_2101339	6	6p22.1	OR11A1	olfactory receptor family 11 subfamily A member 1	26531	-0.372888	0.00135033	0.819913
ILMN_2183891	3	3q26.33	PEX5L	peroxisomal biogenesis factor 5 like	51555	-0.37345	0.0249632	0.883147
ILMN_1677270	11	11q24.1	OR4D5	olfactory receptor family 4 subfamily D member 5	219875	-0.373524	0.0158297	0.837338
ILMN_1709707	8	8p23.1	FAM86B3P	family with sequence similarity 86, member A pseudogene	286042	-0.373733	0.0267159	0.883778
ILMN_1750901	3	3p21.31	GNAT1	G protein subunit alpha transducin 1	2779	-0.374376	0.0083653	0.837338
ILMN_1751206	10	10p12.31	MLLT10	MLLT10 histone lysine methyltransferase DOT1L cofactor	8028	-0.374476	0.0275805	0.883778
ILMN_1784532	8	8q24.23-q24.3	COL22A1	collagen type XXII alpha 1 chain	169044	-0.374604	0.04749	0.919151
ILMN_2195957	8	8p21.3	RHOBTB2	Rho related BTB domain containing 2	23221	-0.374996	0.036507	0.90179
ILMN_1709300	5	5q31.1	IL5	interleukin 5	3567	-0.375148	0.0252905	0.883147
ILMN_1659463	12	12q23.1	APAF1	apoptotic peptidase activating factor 1	317	-0.375628	0.022309	0.881578
ILMN_1727789	X	Xq13.2	RLIM	ring finger protein, LIM domain interacting	51132	-0.375809	0.0310719	0.891088
ILMN_1727258	Y	Yp11.2	AMELY	amelogenin Y-linked	266	-0.375903	0.0497306	0.920838
ILMN_3289128	14	14q23.1	TRMT5	tRNA methyltransferase 5	57570	-0.376355	0.0154427	0.837338
ILMN_1722830	X	Xq28	MAGEA1	MAGE family member A1	4100	-0.376746	0.0473509	0.919151
ILMN_1711611	1	1q32.2	CR1	complement C3b/C4b receptor 1 (Knops blood group)	1378	-0.377523	0.000472041	0.819913
ILMN_1723048	1	1q42.13	GJC2	gap junction protein gamma 2	57165	-0.378874	0.0147449	0.837338
ILMN_2334205	X	Xq13.1	ERCC6L	ERCC excision repair 6 like, spindle assembly checkpoint helicase	54821	-0.3789	0.00958987	0.837338
ILMN_1690004	14	14q11.2	OR4K2	olfactory receptor family 4 subfamily K member 2	390431	-0.380114	0.0381663	0.906174
ILMN_1777691	4	4q12	ARL9	ADP ribosylation factor like GTPase 9	132946	-0.380313	0.0167511	0.844316
ILMN_2378868	14	14q24.1	SRSF5	serine and arginine rich splicing factor 5	6430	-0.380632	0.00307901	0.820678
ILMN_1696110	13	13q34	TUBGCP3	tubulin gamma complex associated protein 3	10426	-0.380679	0.0436164	0.919151
ILMN_1694223	22	22q11.21	DGCR8	DGCR8 microprocessor complex subunit	54487	-0.380775	0.0229358	0.881578
ILMN_1756312	15	15q24.1	SEMA7A	semaphorin 7A (John Milton Hagen blood group)	8482	-0.381003	0.00824783	0.837338
ILMN_1652277	17	17q25.3	SECTM1	secreted and transmembrane 1	6398	-0.381018	0.0270771	0.883778
ILMN_1790338	9	9q34.11	PRRX2	paired related homeobox 2	51450	-0.381426	0.018365	0.860883
ILMN_1741688	10	10q26.13	CPXM2	carboxypeptidase X, M14 family member 2	119587	-0.382582	0.044769	0.919151
ILMN_3232270	1	1p36.13	CROCCP2	CROCC pseudogene 2	84809	-0.382996	0.0272019	0.883778
ILMN_3243037	6	6p21.2	TDRG1	testis development related 1	732253	-0.383227	0.00424323	0.837338
ILMN_1733421	10	10p15.1	PRKCQ	protein kinase C theta	5588	-0.383812	0.00821716	0.837338
ILMN_2294784	6	6q21	PRDM1	PR/SET domain 1	639	-0.384031	0.0260242	0.883778
ILMN_1717644	3	3p12.3	ZNF717	zinc finger protein 717	100131827	-0.38462	0.0353142	0.897431
ILMN_2368728	7	7q36.1	ASIC3	acid sensing ion channel subunit 3	9311	-0.38667	0.00731133	0.837338
ILMN_1681674	7	7p22.3	MAD1L1	mitotic arrest deficient 1 like 1	8379	-0.386858	0.0265244	0.883778
ILMN_1780591	11	11q14.3	FAT3	FAT atypical cadherin 3	120114	-0.387212	0.0253163	0.883147
ILMN_1682930	11	11q13.1	SIPA1	signal-induced proliferation-associated 1	6494	-0.387227	0.0164396	0.837338
ILMN_1693290	17	17p13.3	METTL16	methyltransferase like 16	79066	-0.38789	0.026186	0.883778
ILMN_1700994	22	22q12.1	KREMEN1	kringle containing transmembrane protein 1	83999	-0.388061	0.028472	0.883778
ILMN_1806023	1	1p32.1	JUN	Jun proto-oncogene, AP-1 transcription factor subunit	3725	-0.388242	0.0267734	0.883778
ILMN_2379967	19	19q13.42	FCAR	Fc fragment of IgA receptor	2204	-0.389288	0.0341865	0.895639
ILMN_1737935	1	1p34.3	MACF1	microtubule actin crosslinking factor 1	23499	-0.390561	0.00299626	0.820678
ILMN_1764320	8	8p21.3	C8orf58	chromosome 8 open reading frame 58	541565	-0.3915	0.0130238	0.837338
ILMN_1656364	X	Xq11.2	ASB12	ankyrin repeat and SOCS box containing 12	142689	-0.39183	0.0273339	0.883778
ILMN_1683740	8	8q24.3	TOP1MT	DNA topoisomerase I mitochondrial	116447	-0.391914	0.0266208	0.883778
ILMN_1713550	1	1q32.1	LGR6	leucine rich repeat containing G protein-coupled receptor 6	59352	-0.391921	0.044954	0.919151
ILMN_3235477	21	21q22.3	RRP1	ribosomal RNA processing 1	8568	-0.392022	0.0410316	0.910331
ILMN_1787441	1	1p34.1	CCDC17	coiled-coil domain containing 17	149483	-0.392739	0.0487576	0.920838
ILMN_1657361	22	22q13.1	CBX7	chromobox 7	23492	-0.392775	0.00106842	0.819913
ILMN_1699170	5	5q35.3	MRNIP	MRN complex interacting protein	51149	-0.392814	0.00650351	0.837338
ILMN_1733462	1	1p12	HSD3B2	hydroxy-delta-5-steroid dehydrogenase, 3 beta- and steroid delta-isomerase 2	3284	-0.39392	0.0179701	0.854532
ILMN_1778897	15	15q24.1	TBC1D21	TBC1 domain family member 21	161514	-0.393933	0.0106056	0.837338
ILMN_2093674	14	14q22.2	GMFB	glia maturation factor beta	2764	-0.395194	0.014652	0.837338
ILMN_1757134	19	19p13.11	MPV17L2	MPV17 mitochondrial inner membrane protein like 2	84769	-0.395318	0.0339276	0.895639
ILMN_3247059	7	7q31.32	HYAL6P	hyaluronidase 6, pseudogene	26062	-0.39691	0.0284502	0.883778
ILMN_1805449	12	12p13.31	TAPBPL	TAP binding protein like	55080	-0.397274	0.0421025	0.914758
ILMN_2171596	7	7q11.23	SPDYE7P	speedy/RINGO cell cycle regulator family member E7, pseudogene	441251	-0.397476	0.0222138	0.881578
ILMN_1765668	3	3q22.3	IL20RB	interleukin 20 receptor subunit beta	53833	-0.397897	0.0177374	0.854532
ILMN_1777366	8	8q23.1	EMC2	ER membrane protein complex subunit 2	9694	-0.398909	0.00940758	0.837338
ILMN_2073202	22	22q13.2	MEI1	meiotic double-stranded break formation protein 1	150365	-0.399326	0.0190073	0.870246
ILMN_1733135	6	6p24.3	TFAP2A	transcription factor AP-2 alpha	7020	-0.399652	0.0156702	0.837338
ILMN_2211534	17	17q25.3	TMC8	transmembrane channel like 8	147138	-0.399789	0.027149	0.883778
ILMN_2170080	3	3p25.3	CIDECP1	cell death inducing DFFA like effector c pseudogene 1	152302	-0.400395	0.00934667	0.837338
ILMN_1747058	16	16q24.3	TRAPPC2L	trafficking protein particle complex 2 like	51693	-0.401046	0.00432103	0.837338
ILMN_1767260	2	2q13	CCDC138	coiled-coil domain containing 138	165055	-0.401426	0.0347065	0.895639
ILMN_1698728	12	12p11.21	FGD4	FYVE, RhoGEF and PH domain containing 4	121512	-0.401484	0.0161444	0.837338
ILMN_1758066	21	21q22.13	DSCR8	Down syndrome critical region 8	84677	-0.401733	0.00978337	0.837338
ILMN_2331197	21	21q22.11	PAXBP1	PAX3 and PAX7 binding protein 1	94104	-0.40196	0.0147422	0.837338
ILMN_2351548	3	3q22.3	FAIM	Fas apoptotic inhibitory molecule	55179	-0.402071	0.0245935	0.883147
ILMN_2135321	3	3p21.1	CHDH	choline dehydrogenase	55349	-0.402357	0.00467038	0.837338
ILMN_1751147	17	17p13.1	SENP3	SUMO specific peptidase 3	26168	-0.403585	0.0335464	0.895639
ILMN_3246957	17	17p13.1	PIK3R6	phosphoinositide-3-kinase regulatory subunit 6	146850	-0.403744	0.0150043	0.837338
ILMN_2187830	5	5q14.3	CCNH	cyclin H	902	-0.404701	0.045595	0.919151
ILMN_1854544	5	5q21.3	LINC01848	long intergenic non-protein coding RNA 1848	100289673	-0.404877	0.0436103	0.919151
ILMN_1743021	12	12q24.31	CAMKK2	calcium/calmodulin dependent protein kinase kinase 2	10645	-0.404901	0.00343938	0.829203
ILMN_1665384	1	1q44	SH3BP5L	SH3 binding domain protein 5 like	80851	-0.40492	0.0394951	0.906174
ILMN_2153547	11	11q11	OR4C15	olfactory receptor family 4 subfamily C member 15	81309	-0.40601	0.0218606	0.881578
ILMN_3248505	7	7q22.1	COL26A1	collagen type XXVI alpha 1 chain	136227	-0.406431	0.00399192	0.837338
ILMN_2393149	17	17p13.1	ALOX15B	arachidonate 15-lipoxygenase type B	247	-0.408208	0.0307385	0.886772
ILMN_2366642	X	Xp22.31	VCX3A	variable charge X-linked 3A	51481	-0.408276	0.00183121	0.820083
ILMN_1754988	21	21q21.3	N6AMT1	N-6 adenine-specific DNA methyltransferase 1	29104	-0.408405	0.0151662	0.837338
ILMN_1741736	16	16q22.1	DDX28	DEAD-box helicase 28	55794	-0.408519	0.0104549	0.837338
ILMN_1773645	3	3p21.31	GMPPB	GDP-mannose pyrophosphorylase B	29925	-0.409414	0.00894662	0.837338
ILMN_3248551	15	15q22.2	C2CD4B	C2 calcium dependent domain containing 4B	388125	-0.40955	0.0284547	0.883778
ILMN_2384188	18	18q23	NFATC1	nuclear factor of activated T cells 1	4772	-0.409584	0.0143661	0.837338
ILMN_1728301	10	10p12.1	GAD2	glutamate decarboxylase 2	2572	-0.409803	0.00157026	0.820083
ILMN_1803773	19	19q13.12	MAG	myelin associated glycoprotein	4099	-0.410667	0.00524708	0.837338
ILMN_3236765	7	7q22.1	POLR2J3	RNA polymerase II subunit J3	548644	-0.411843	0.00549566	0.837338
ILMN_1791388	19	19q13.43	ZNF787	zinc finger protein 787	126208	-0.412072	0.0214829	0.881578
ILMN_1658420	21	21q22.2	DSCAM	DS cell adhesion molecule	1826	-0.412078	0.038168	0.906174
ILMN_1729767	12	12q13.13	TARBP2	TARBP2 subunit of RISC loading complex	6895	-0.414214	0.00909856	0.837338
ILMN_3262936	2	2p23.1	LCLAT1	lysocardiolipin acyltransferase 1	253558	-0.414785	0.0286222	0.883778
ILMN_3236452	19	19q13.12	FAM187B	family with sequence similarity 187 member B	148109	-0.416536	0.00728808	0.837338
ILMN_2105539	12	12q24.33	FZD10	frizzled class receptor 10	11211	-0.416742	0.00813563	0.837338
ILMN_1806651	5	5q11.1	PARP8	poly(ADP-ribose) polymerase family member 8	79668	-0.417978	0.0136313	0.837338
ILMN_2100357	6	6q22.31	SMPDL3A	sphingomyelin phosphodiesterase acid like 3A	10924	-0.418111	0.00369908	0.837338
ILMN_1704173	22	22q11.21	AIFM3	apoptosis inducing factor mitochondria associated 3	150209	-0.418538	0.00155615	0.820083
ILMN_1814044	22	22q11.23	CABIN1	calcineurin binding protein 1	23523	-0.418866	0.0154048	0.837338
ILMN_1701482	21	21q22.3	POFUT2	protein O-fucosyltransferase 2	23275	-0.419212	0.022442	0.881578
ILMN_1787345	12	12q13.12	FKBP11	FKBP prolyl isomerase 11	51303	-0.420252	0.0442789	0.919151
ILMN_1738580	6	6q21	NR2E1	nuclear receptor subfamily 2 group E member 1	7101	-0.420622	0.0151472	0.837338
ILMN_2308806	10	10q11.22	MAPK8	mitogen-activated protein kinase 8	5599	-0.42083	0.014545	0.837338
ILMN_1751393	1	1p34.2	ZNF684	zinc finger protein 684	127396	-0.420978	0.0130083	0.837338
ILMN_1723158	12	12p13.31	NOP2	NOP2 nucleolar protein	4839	-0.421383	0.0210941	0.881578
ILMN_3247681	2	2p11.2	C2orf68	chromosome 2 open reading frame 68	388969	-0.421745	0.0319627	0.894622
ILMN_1668593	11	11p15.4	HPX	hemopexin	3263	-0.421825	0.0284585	0.883778
ILMN_1691149	5	5q21.1	LOC100133050	glucuronidase beta pseudogene	100133050	-0.421872	0.00221353	0.820678
ILMN_1726786	22	22q13.1	TNRC6B	trinucleotide repeat containing adaptor 6B	23112	-0.422302	0.0299029	0.884921
ILMN_1772216	X	Xp11.3	RBM10	RNA binding motif protein 10	8241	-0.422713	0.01419	0.837338
ILMN_1741281	4	4q31.3	RNF175	ring finger protein 175	285533	-0.422799	0.0285451	0.883778
ILMN_1760305	12	12q24.33	FBRSL1	fibrosin like 1	57666	-0.423475	0.00529668	0.837338
ILMN_1719393	8	8q23.1	TRHR	thyrotropin releasing hormone receptor	7201	-0.423951	0.0211058	0.881578
ILMN_1764158	17	17p13.1	NLGN2	neuroligin 2	57555	-0.423985	0.00767244	0.837338
ILMN_1756070	11	11p15.2	INSC	INSC spindle orientation adaptor protein	387755	-0.425431	0.00103022	0.819913
ILMN_1653833	13	13q31.3	LINC00410	long intergenic non-protein coding RNA 410	144776	-0.425768	0.0387186	0.906174
ILMN_2253286	1	1p36.33	PRKCZ	protein kinase C zeta	5590	-0.425827	0.0401672	0.906174
ILMN_1755811	5	5p13.1	FBXO4	F-box protein 4	26272	-0.4262	0.0414599	0.91088
ILMN_1787275	7	7q22.1	STAG3	stromal antigen 3	10734	-0.427049	0.0411239	0.910849
ILMN_1729417	9	9p13.3	GNE	glucosamine (UDP-N-acetyl)-2-epimerase/N-acetylmannosamine kinase	10020	-0.428931	0.0231589	0.881578
ILMN_3236443	12	12q21.31	ALX1	ALX homeobox 1	8092	-0.42917	0.00271732	0.820678
ILMN_2197228	20	20q11.21	DEFB122	defensin beta 122 (pseudogene)	245935	-0.429749	0.00280547	0.820678
ILMN_3201153	1	1p36.33	VWA1	von Willebrand factor A domain containing 1	64856	-0.430744	0.0154702	0.837338
ILMN_1666068	17	17q25.1	JMJD6	jumonji domain containing 6, arginine demethylase and lysine hydroxylase	23210	-0.432227	0.00718937	0.837338
ILMN_3308025	6	6q27	MIR1913	microRNA 1913	100302141	-0.432877	0.0159181	0.837338
ILMN_1760647	7	7p15.2	HOXA3	homeobox A3	3200	-0.433613	0.00836991	0.837338
ILMN_1721344	19	19p13.3	MOB3A	MOB kinase activator 3A	126308	-0.434218	0.0151712	0.837338
ILMN_1810400	20	20p13	IDH3B	isocitrate dehydrogenase (NAD(+)) 3 non-catalytic subunit beta	3420	-0.43493	0.00146117	0.819913
ILMN_2307032	11	11p15.4	OSBPL5	oxysterol binding protein like 5	114879	-0.435034	0.0257688	0.883778
ILMN_1801051	5	5q31.3	PCDHB8	protocadherin beta 8	56128	-0.435621	0.0343988	0.895639
ILMN_1743767	19	19q13.43	ZNF446	zinc finger protein 446	55663	-0.435927	0.00421642	0.837338
ILMN_2075507	1	1p12	MAN1A2	mannosidase alpha class 1A member 2	10905	-0.436164	0.00854786	0.837338
ILMN_2337928	11	11q23.3	CXCR5	C-X-C motif chemokine receptor 5	643	-0.436851	0.0188669	0.869054
ILMN_1772780	12	12q23.3	TCP11L2	t-complex 11 like 2	255394	-0.436921	0.0271458	0.883778
ILMN_1655241	8	8p12	PURG	purine rich element binding protein G	29942	-0.437634	0.0188406	0.869054
ILMN_1675878	3	3q12.3	PDCL3P4	PDCL3 pseudogene 4	285359	-0.43773	0.0125017	0.837338
ILMN_1793267	19	19q13.31	ETHE1	ETHE1 persulfide dioxygenase	23474	-0.438373	0.0161099	0.837338
ILMN_1695472	17	17q21.32	MRPL10	mitochondrial ribosomal protein L10	124995	-0.438839	0.00840481	0.837338
ILMN_1708375	5	5q31.1	IRF1	interferon regulatory factor 1	3659	-0.438968	0.012326	0.837338
ILMN_3246673	17	17p13.1	SLC35G6	solute carrier family 35 member G6	643664	-0.439302	0.0233132	0.881578
ILMN_1787897	4	4q13.3	CXCL1	C-X-C motif chemokine ligand 1	2919	-0.439631	0.0249115	0.883147
ILMN_1698237	1	1q42.13	TRIM17	tripartite motif containing 17	51127	-0.439978	0.0032221	0.825351
ILMN_1764230	16	16p13.3	GNPTG	N-acetylglucosamine-1-phosphate transferase subunit gamma	84572	-0.440969	0.0327078	0.895639
ILMN_1765021	22	22q11.22	TOP3B	DNA topoisomerase III beta	8940	-0.444499	0.0291859	0.883778
ILMN_1686555	6	6q21	FYN	FYN proto-oncogene, Src family tyrosine kinase	2534	-0.444621	0.0256114	0.883778
ILMN_1660963	9	9p13.3	CCIN	calicin	881	-0.446141	0.0102609	0.837338
ILMN_1679185	4	4q25	LEF1	lymphoid enhancer binding factor 1	51176	-0.447207	0.00126934	0.819913
ILMN_1685043	7	7q22.1	CYP3A7	cytochrome P450 family 3 subfamily A member 7	1551	-0.447625	0.000546373	0.819913
ILMN_1683377	2	2q33.3	MDH1B	malate dehydrogenase 1B	130752	-0.447909	0.0211567	0.881578
ILMN_1731688	4	4p14	KLB	klotho beta	152831	-0.448221	0.00365871	0.837338
ILMN_1727331	5	5q35.3	LOC202181	SUMO interacting motifs containing 1 pseudogene	202181	-0.4483	0.00377934	0.837338
ILMN_1659202	2	2q24.3	B3GALT1	beta-1,3-galactosyltransferase 1	8708	-0.451822	0.0229937	0.881578
ILMN_2295879	14	14q11.2	NGDN	neuroguidin	25983	-0.452706	0.0180842	0.855075
ILMN_1809496	7	7q32.2	COPG2	COPI coat complex subunit gamma 2	26958	-0.454265	0.0305756	0.886772
ILMN_1762093	16	16q12.1	ABCC12	ATP binding cassette subfamily C member 12	94160	-0.454931	0.0254434	0.883147
ILMN_1804444	16	16p13.3	PDIA2	protein disulfide isomerase family A member 2	64714	-0.454981	0.00683927	0.837338
ILMN_1736285	3	3p21.1	RFT1	RFT1 homolog	91869	-0.456157	0.00781281	0.837338
ILMN_1768598	19	19q13.42	LAIR1	leukocyte associated immunoglobulin like receptor 1	3903	-0.456437	0.0222868	0.881578
ILMN_1801697	19	19q13.12	SYNE4	spectrin repeat containing nuclear envelope family member 4	163183	-0.457471	0.00881458	0.837338
ILMN_1733675	X	Xq28	MPP1	membrane palmitoylated protein 1	4354	-0.461317	0.0192579	0.873833
ILMN_1684352	1	1p13.1	TRIM45	tripartite motif containing 45	80263	-0.461607	0.0387826	0.906174
ILMN_2096747	6	6q23.2	SNORA33	small nucleolar RNA, H/ACA box 33	594839	-0.462339	0.0244696	0.883147
ILMN_1699317	3	3p26.3	CNTN6	contactin 6	27255	-0.46274	0.00279758	0.820678
ILMN_1719616	16	16p13.3	DNASE1	deoxyribonuclease 1	1773	-0.462977	0.024304	0.883147
ILMN_1704554	11	11q22.3	CASP4LP	caspase 4 like, pseudogene	643733	-0.463479	0.0261922	0.883778
ILMN_1689585	20	20p13	C20orf194	chromosome 20 open reading frame 194	25943	-0.463823	0.0398931	0.906174
ILMN_1770451	19	19p13.3	KLF16	Kruppel like factor 16	83855	-0.463936	0.0244719	0.883147
ILMN_3242618	X	Xq13.1	NHSL2	NHS like 2	340527	-0.464264	0.00393626	0.837338
ILMN_1768798	17	17q21.33	SPAG9	sperm associated antigen 9	9043	-0.466928	0.0338598	0.895639
ILMN_2269136	7	7q36.1	AGAP3	ArfGAP with GTPase domain, ankyrin repeat and PH domain 3	116988	-0.468185	0.0175699	0.85282
ILMN_1674050	1	1p34.3	COL8A2	collagen type VIII alpha 2 chain	1296	-0.469106	0.00227429	0.820678
ILMN_1774375	19	19p13.3	SMIM24	small integral membrane protein 24	284422	-0.469226	0.01956	0.875175
ILMN_1680246	5	5q34	MAT2B	methionine adenosyltransferase 2B	27430	-0.47043	0.00370628	0.837338
ILMN_1814464	17	17q21.2	RAMP2	receptor activity modifying protein 2	10266	-0.470901	0.0169938	0.848184
ILMN_1736448	7	7p12.2	VWC2	von Willebrand factor C domain containing 2	375567	-0.471777	0.0164461	0.837338
ILMN_2172600	19	19q13.12	ZNF345	zinc finger protein 345	25850	-0.474705	0.0133428	0.837338
ILMN_1768181	1	1q25.2	TOR3A	torsin family 3 member A	64222	-0.474772	0.0251582	0.883147
ILMN_3236736	X	Xq28	ZFP92	ZFP92 zinc finger protein	139735	-0.476324	0.0227434	0.881578
ILMN_1739397	1	1p22.1	GLMN	glomulin, FKBP associated protein	11146	-0.478897	0.00263157	0.820678
ILMN_1705745	1	1q44	OR14I1	olfactory receptor family 14 subfamily I member 1	401994	-0.479349	0.00172919	0.820083
ILMN_3297118	14	14q12	LOC728755	uncharacterized LOC728755	728755	-0.479457	0.00761572	0.837338
ILMN_1776240	10	10q22.2	DUSP13	dual specificity phosphatase 13	51207	-0.480202	0.010568	0.837338
ILMN_1732860	19	19q13.33	LOC400710	uncharacterized LOC400710	400710	-0.480621	0.0192638	0.873833
ILMN_1683811	7	7q32.1	TNPO3	transportin 3	23534	-0.481332	0.0143923	0.837338
ILMN_1690530	2	2q11.2	FER1L5	fer-1 like family member 5	90342	-0.484433	0.0104027	0.837338
ILMN_2211189	9	9q31.3	ELP1	elongator complex protein 1	8518	-0.485142	0.00132929	0.819913
ILMN_1748614	11	11q13.4	RELT	RELT TNF receptor	84957	-0.485625	0.00233176	0.820678
ILMN_1691557	3	3p21.31	NDUFAF3	NADH:ubiquinone oxidoreductase complex assembly factor 3	25915	-0.488826	0.0432106	0.918451
ILMN_1767377	5	5q13.2	GUSBP14	GUSB pseudogene 14	11039	-0.489948	0.0215549	0.881578
ILMN_1748981	19	19q13.33	KLK3	kallikrein related peptidase 3	354	-0.490387	0.000917613	0.819913
ILMN_1686416	3	3p25.1	GRIP2	glutamate receptor interacting protein 2	80852	-0.491456	0.0333265	0.895639
ILMN_1733103	7	7q11.21	LINC00174	long intergenic non-protein coding RNA 174	285908	-0.492378	0.00532607	0.837338
ILMN_1775211	1	1q42.3	ERO1B	endoplasmic reticulum oxidoreductase 1 beta	56605	-0.493211	0.00791693	0.837338
ILMN_1653429	1	1p21.2	SLC35A3	solute carrier family 35 member A3	23443	-0.493502	0.0159501	0.837338
ILMN_1678707	17	17q12	TAF15	TATA-box binding protein associated factor 15	8148	-0.495003	0.011362	0.837338
ILMN_3273620	14	14q11.2	KLHL33	kelch like family member 33	123103	-0.495786	0.022387	0.881578
ILMN_1785452	9	9q13	PTGER4P2-CDK2AP2P2	PTGER4P2-CDK2AP2P2 readthrough, transcribed pseudogene	442421	-0.496249	0.0481246	0.919151
ILMN_1671997	17	17q25.3	PVALEF	parvalbumin like EF-hand containing	388428	-0.497602	0.00120385	0.819913
ILMN_1805932	6	6q15	C6orf163	chromosome 6 open reading frame 163	206412	-0.499394	0.0315457	0.894622
ILMN_1661861	5	5q31.1	CSF2	colony stimulating factor 2	1437	-0.499711	0.00108744	0.819913
ILMN_1723480	19	19p13.11	BST2	bone marrow stromal cell antigen 2	684	-0.499772	0.0220176	0.881578
ILMN_1727099	10	10q23.31	FLJ37201	tigger transposable element derived 2 pseudogene	283011	-0.500197	0.0138665	0.837338
ILMN_1739199	15	15q26.3	WASH3P	WASP family homolog 3, pseudogene	374666	-0.501042	0.0164534	0.837338
ILMN_1654735	15	15q26.1	SLCO3A1	solute carrier organic anion transporter family member 3A1	28232	-0.501295	0.00260575	0.820678
ILMN_1781285	5	5q35.1	DUSP1	dual specificity phosphatase 1	1843	-0.501614	0.00602494	0.837338
ILMN_1688633	3	3q27.1	CLCN2	chloride voltage-gated channel 2	1181	-0.503738	0.00527914	0.837338
ILMN_2098616	5	5p12	ANXA2R	annexin A2 receptor	389289	-0.504372	0.0135893	0.837338
ILMN_1741288	19	19p13.2	ZNF136	zinc finger protein 136	7695	-0.506829	0.0117221	0.837338
ILMN_1655161	1	1p36.32	MORN1	MORN repeat containing 1	79906	-0.507248	0.0195492	0.875175
ILMN_1914857	2	2q31.2	PJVK	pejvakin	494513	-0.5079	0.00887606	0.837338
ILMN_1715718	19	19q13.42	ZNF784	zinc finger protein 784	147808	-0.510926	0.0171172	0.848715
ILMN_1793630	2	2q35	SLC4A3	solute carrier family 4 member 3	6508	-0.511314	0.00300859	0.820678
ILMN_1669927	2	2q33.2	ICOS	inducible T cell costimulator	29851	-0.513117	0.00788346	0.837338
ILMN_2121555	6	6q25.2	FBXO5	F-box protein 5	26271	-0.513224	0.0328676	0.895639
ILMN_1794863	1	1p36.12	CAMK2N1	calcium/calmodulin dependent protein kinase II inhibitor 1	55450	-0.514187	0.0339781	0.895639
ILMN_1734830	1	1p36.22	MTHFR	methylenetetrahydrofolate reductase	4524	-0.515621	0.0208315	0.880131
ILMN_1683824	2	2q37.3	ANO7	anoctamin 7	50636	-0.516055	0.00262478	0.820678
ILMN_1811719	11	11q13.5	MYO7A	myosin VIIA	4647	-0.51621	0.0033039	0.8254
ILMN_1666022	8	8p21.3	TNFRSF10D	TNF receptor superfamily member 10d	8793	-0.517117	0.0223128	0.881578
ILMN_2073969	13	13q33.3	ABHD13	abhydrolase domain containing 13	84945	-0.517522	0.00497901	0.837338
ILMN_1726549	X	Xq13.1	GDPD2	glycerophosphodiester phosphodiesterase domain containing 2	54857	-0.517554	0.0116378	0.837338
ILMN_1682675	12	12q12	TWF1	twinfilin actin binding protein 1	5756	-0.517595	0.0147352	0.837338
ILMN_1662523	19	19p13.3	C3	complement C3	718	-0.51778	0.00343202	0.829203
ILMN_1762561	16	16p13.12	PLA2G10	phospholipase A2 group X	8399	-0.518654	0.00495382	0.837338
ILMN_1792497	2	2q36.3	AGFG1	ArfGAP with FG repeats 1	3267	-0.52014	0.049447	0.920838
ILMN_2403911	4	4q31.3	ARFIP1	ADP ribosylation factor interacting protein 1	27236	-0.520418	0.0027307	0.820678
ILMN_1778187	1	1q21.2	TARS2	threonyl-tRNA synthetase 2, mitochondrial	80222	-0.521233	0.000835003	0.819913
ILMN_2057566	16	16p13.3	PGP	phosphoglycolate phosphatase	283871	-0.522254	0.00103969	0.819913
ILMN_1685742	15	15q11.2	NIPA2	NIPA magnesium transporter 2	81614	-0.523154	0.0111678	0.837338
ILMN_2093720	5	5q33.3	THG1L	tRNA-histidine guanylyltransferase 1 like	54974	-0.523792	0.0152513	0.837338
ILMN_1735108	9	9q22.33	ANKS6	ankyrin repeat and sterile alpha motif domain containing 6	203286	-0.524133	0.00396507	0.837338
ILMN_2348975	1	1p34.1	NASP	nuclear autoantigenic sperm protein	4678	-0.524592	0.00859422	0.837338
ILMN_2321064	19	19q13.33	BAX	BCL2 associated X, apoptosis regulator	581	-0.527584	0.0159904	0.837338
ILMN_1750325	9	9q34.11	USP20	ubiquitin specific peptidase 20	10868	-0.52843	0.000521506	0.819913
ILMN_1755502	11	11q23.3	USP2	ubiquitin specific peptidase 2	9099	-0.529016	0.00475587	0.837338
ILMN_1673181	6	6q23.2	SNORD100	small nucleolar RNA, C/D box 100	594838	-0.529473	0.0378437	0.906174
ILMN_1797189	12	12q13.13	MAP3K12	mitogen-activated protein kinase kinase kinase 12	7786	-0.530259	0.000960091	0.819913
ILMN_1687273	10	10q11.22	BMS1P2	BMS1 pseudogene 2	642826	-0.532837	0.00543992	0.837338
ILMN_1661078	15	15q15.1	PHGR1	proline, histidine and glycine rich 1	644844	-0.533179	0.0295567	0.883778
ILMN_1811927	1	1q44	OR2W3	olfactory receptor family 2 subfamily W member 3	343171	-0.533769	0.0386042	0.906174
ILMN_1674405	1	1p13.3	CEPT1	choline/ethanolamine phosphotransferase 1	10390	-0.538854	0.0175322	0.85282
ILMN_1737498	16	16q23.1	MLKL	mixed lineage kinase domain like pseudokinase	197259	-0.539074	0.012594	0.837338
ILMN_2058270	12	12q13.13	SOAT2	sterol O-acyltransferase 2	8435	-0.540711	0.028493	0.883778
ILMN_1777513	17	17p13.1	KCTD11	potassium channel tetramerization domain containing 11	147040	-0.541714	0.025605	0.883778
ILMN_1702301	2	2q36.2	DOCK10	dedicator of cytokinesis 10	55619	-0.542052	0.000634252	0.819913
ILMN_3309409	X	Xq26.2	MIR106A	microRNA 106a	406899	-0.545193	0.00648107	0.837338
ILMN_2164007	6	6q25.1	RAET1E	retinoic acid early transcript 1E	135250	-0.545743	0.013396	0.837338
ILMN_1730945	19	19p13.11	TMEM59L	transmembrane protein 59 like	25789	-0.546349	0.0112246	0.837338
ILMN_3288752	7	7p15.3	IL6-AS1	IL6 antisense RNA 1	541472	-0.549377	0.00487331	0.837338
ILMN_1729791	1	1q22	UBQLN4	ubiquilin 4	56893	-0.549499	0.00965873	0.837338
ILMN_1675646	2	2q35	FN1	fibronectin 1	2335	-0.54971	0.00728309	0.837338
ILMN_1798085	19	19q13.2	EID2B	EP300 interacting inhibitor of differentiation 2B	126272	-0.550544	0.029521	0.883778
ILMN_3251303	3	3p25.1	NR2C2	nuclear receptor subfamily 2 group C member 2	7182	-0.552596	0.00217486	0.820678
ILMN_2385239	3	3p21.1	PBRM1	polybromo 1	55193	-0.552781	0.00645642	0.837338
ILMN_1787831	19	19p13.3	ODF3L2	outer dense fiber of sperm tails 3 like 2	284451	-0.553208	0.010019	0.837338
ILMN_3210917	9	9q34.11	SET	SET nuclear proto-oncogene	6418	-0.557961	0.0296214	0.884921
ILMN_1812473	9	9p21.3	MLLT3	MLLT3 super elongation complex subunit	4300	-0.559217	0.0161243	0.837338
ILMN_1717677	14	14q11.2	ZFHX2	zinc finger homeobox 2	85446	-0.561114	0.0171338	0.848715
ILMN_1803774	2	2q35	STK16	serine/threonine kinase 16	8576	-0.562606	0.00541227	0.837338
ILMN_1670764	21	21q21.1	USP25	ubiquitin specific peptidase 25	29761	-0.56314	0.00462753	0.837338
ILMN_3244363	19	19p13.12	WIZ	WIZ zinc finger	58525	-0.563919	0.03168	0.894622
ILMN_1652931	11	11q23.2	CLDN25	claudin 25	644672	-0.566505	0.00338979	0.82884
ILMN_1799289	1	1q42.13	MRPL55	mitochondrial ribosomal protein L55	128308	-0.57193	0.0198636	0.876422
ILMN_1785427	6	6q25.2	SYNE1	spectrin repeat containing nuclear envelope protein 1	23345	-0.572145	0.00433376	0.837338
ILMN_1684083	14	14q11.2	RNASE10	ribonuclease A family member 10 (inactive)	338879	-0.573846	0.00934548	0.837338
ILMN_1689380	1	1p36.22	FBXO44	F-box protein 44	93611	-0.575348	0.000965781	0.819913
ILMN_2047480	X	Xp11.3	DIPK2B	divergent protein kinase domain 2B	79742	-0.583356	0.0305171	0.886772
ILMN_1655348	2	2q33.3	GPR1	G protein-coupled receptor 1	2825	-0.586473	0.000422878	0.819913
ILMN_1714023	16	16q22.1	SLC9A5	solute carrier family 9 member A5	6553	-0.59046	0.0482995	0.919151
ILMN_1696845	19	19q13.32	ARHGAP35	Rho GTPase activating protein 35	2909	-0.597269	0.0192924	0.873833
ILMN_3255124	14	14q22.1	ATL1	atlastin GTPase 1	51062	-0.597705	0.00442495	0.837338
ILMN_1815392	X	Xq25	ACTRT1	actin related protein T1	139741	-0.600633	0.0100908	0.837338
ILMN_3181473	12	12q12	PRICKLE1	prickle planar cell polarity protein 1	144165	-0.603605	0.0207471	0.878608
ILMN_1815570	7	7p15.2	HOXA6	homeobox A6	3203	-0.604179	0.0499579	0.921535
ILMN_3234997	1	1p34.3	MAP7D1	MAP7 domain containing 1	55700	-0.605028	0.00283905	0.820678
ILMN_1757660	19	19p13.3	CAPS	calcyphosine	828	-0.609821	0.0031699	0.825351
ILMN_1703803	4	4q13.3	ADAMTS3	ADAM metallopeptidase with thrombospondin type 1 motif 3	9508	-0.61126	0.0235137	0.881578
ILMN_1675325	4	4q25	ENPEP	glutamyl aminopeptidase	2028	-0.612518	0.000688733	0.819913
ILMN_1671913	22	22q11.21	TRMT2A	tRNA methyltransferase 2 homolog A	27037	-0.615048	0.0201194	0.878534
ILMN_2043828	8	8q24.11	UTP23	UTP23 small subunit processome component	84294	-0.615356	0.00241263	0.820678
ILMN_1804569	11	11p14.3	GAS2	growth arrest specific 2	2620	-0.623448	0.00211401	0.820678
ILMN_3221888	X	Xq13.2	NAP1L6P	nucleosome assembly protein 1 like 6, pseudogene	645996	-0.62745	0.0018316	0.820083
ILMN_1678781	19	19q13.12	ARHGAP33	Rho GTPase activating protein 33	115703	-0.632088	0.0160413	0.837338
ILMN_1805366	X	Xq22.3	TBC1D8B	TBC1 domain family member 8B	54885	-0.632565	0.00107791	0.819913
ILMN_1703228	7	7q22.1	AGFG2	ArfGAP with FG repeats 2	3268	-0.634543	0.00145162	0.819913
ILMN_1813664	22	22q11.21	HIRA	histone cell cycle regulator	7290	-0.640192	0.0381163	0.906174
ILMN_1695506	4	4q25	DKK2	dickkopf WNT signaling pathway inhibitor 2	27123	-0.644721	0.00379224	0.837338
ILMN_1761083	2	2q31.2	HNRNPA3	heterogeneous nuclear ribonucleoprotein A3	220988	-0.650644	0.00546872	0.837338
ILMN_1762899	5	5q31.2	EGR1	early growth response 1	1958	-0.661359	0.00304964	0.820678
ILMN_3310840	17	17q23.1	MIR21	microRNA 21	406991	-0.665757	0.000683441	0.819913
ILMN_1808979	12	12p13.31	CLEC4D	C-type lectin domain family 4 member D	338339	-0.670972	0.0223708	0.881578
ILMN_1695872	1	1p36.12	CDC42	cell division cycle 42	998	-0.672276	0.00482485	0.837338
ILMN_1893909	2	2q34	IKZF2	IKAROS family zinc finger 2	22807	-0.676421	0.00327976	0.825351
ILMN_2151277	1	1q32.3	LPGAT1	lysophosphatidylglycerol acyltransferase 1	9926	-0.682157	0.00100698	0.819913
ILMN_1661293	19	19q13.31	ZNF224	zinc finger protein 224	7767	-0.705686	0.000933174	0.819913
ILMN_1693452	7	7q22.1	GAL3ST4	galactose-3-O-sulfotransferase 4	79690	-0.721386	0.00167121	0.820083
ILMN_1723287	19	19q13.33	SLC6A16	solute carrier family 6 member 16	28968	-0.725714	0.000721014	0.819913
ILMN_1710571	16	16q12.1	TENT4B	terminal nucleotidyltransferase 4B	64282	-0.742702	0.0219166	0.881578
ILMN_3241750	5	5q31.1	CCNI2	cyclin I family member 2	645121	-0.800319	0.0448814	0.919151
ILMN_1658717	22	22q12.2-q12.3	DEPDC5	DEP domain containing 5, GATOR1 subcomplex subunit	9681	-0.811998	0.00675282	0.837338
ILMN_1778788	3	3q22.2	AMOTL2	angiomotin like 2	51421	-0.817019	0.00142012	0.819913
ILMN_1669523	14	14q24.3	FOS	Fos proto-oncogene, AP-1 transcription factor subunit	2353	-1.29936	0.000226967	0.819913
